# Supplementary material for: Recent insights into the biosynthesis and biological activities of the peptide-derived redox cofactor mycofactocin
Source: Royal Society of Chemistry journal article supplement (doi:10.1039/d5np00012b), 2025-01-01
Supplement: d5np00012b1.xlsx [file d5np00012b1.xlsx]

## Sheet: Tabelle1
Name	Abbreviation	Sum Formula	SMILES	SMILES_stereoGlucan	Theoretical Monoisotopic Mass	Strain (if found in wild type strain, only WT name is provided), only the first reported identification is reported	Publication
Mycofactocin Precursor Peptide MftA (MDRETEAETAELVTESLVEEVSIDGMCGVY)	MftA (M. ulcerans / WP_071498352.1)	C137H221N33O55S3	OC([C@@H](NC([C@@H](NC(CNC([C@@H](NC([C@@H](NC(CNC([C@@H](NC([C@]([C@@H](C)CC)(NC([C@@H](NC([C@@H](NC([C@@H](NC([C@@H](NC([C@@H](NC([C@H](CC(C)C)NC([C@@H](NC([C@@H](NC([C@]([C@H](O[H])C)(NC([C@@H](NC([C@H](CC(C)C)NC([C@@H](NC([C@H](C)NC([C@]([C@H](O[H])C)(NC([C@@H](NC([C@H](C)NC([C@@H](NC([C@]([C@H](O[H])C)(NC([C@@H](NC([C@@H](NC([C@@H](NC([C@@H](N[H])CCSC)=O)CC(O)=O)=O)CCC/N=C(N[H])/N)=O)CCC(O)=…	OC([C@@H](NC([C@@H](NC(CNC([C@@H](NC([C@@H](NC(CNC([C@@H](NC([C@]([C@@H](C)CC)(NC([C@@H](NC([C@@H](NC([C@@H](NC([C@@H](NC([C@@H](NC([C@H](CC(C)C)NC([C@@H](NC([C@@H](NC([C@]([C@H](O[H])C)(NC([C@@H](NC([C@H](CC(C)C)NC([C@@H](NC([C@H](C)NC([C@]([C@H](O[H])C)(NC([C@@H](NC([C@H](C)NC([C@@H](NC([C@]([C@H](O[H])C)(NC([C@@H](NC([C@@H](NC([C@@H](NC([C@@H](N[H])CCSC)=O)CC(O)=O)=O)CCC/N=C(N[H])/N)=O)CCC(O)=…	3304.47	Mycobacterium ulcerans Agy99	https://doi.org/10.1074/jbc.M117.795682
Mycofactocin Precursor Peptide MftA, modified by MftC	MftA* (M. ulcerans / WP_071498352.1)	C136H219N33O53S3	OC(C=C1)=CC=C1CC2NC(C(NC(CNC([C@@H](NC([C@@H](NC(CNC([C@@H](NC([C@]([C@@H](C)CC)(NC([C@@H](NC([C@@H](NC([C@@H](NC([C@@H](NC([C@@H](NC([C@H](CC(C)C)NC([C@@H](NC([C@@H](NC([C@]([C@H](O[H])C)(NC([C@@H](NC([C@H](CC(C)C)NC([C@@H](NC([C@H](C)NC([C@]([C@H](O[H])C)(NC([C@@H](NC([C@H](C)NC([C@@H](NC([C@]([C@H](O[H])C)(NC([C@@H](NC([C@@H](NC([C@@H](NC([C@@H](N[H])CCSC)=O)CC(O)=O)=O)CCC/N=C(N[H])/N)=O)CCC(O…	OC(C=C1)=CC=C1CC2NC(C(NC(CNC([C@@H](NC([C@@H](NC(CNC([C@@H](NC([C@]([C@@H](C)CC)(NC([C@@H](NC([C@@H](NC([C@@H](NC([C@@H](NC([C@@H](NC([C@H](CC(C)C)NC([C@@H](NC([C@@H](NC([C@]([C@H](O[H])C)(NC([C@@H](NC([C@H](CC(C)C)NC([C@@H](NC([C@H](C)NC([C@]([C@H](O[H])C)(NC([C@@H](NC([C@H](C)NC([C@@H](NC([C@]([C@H](O[H])C)(NC([C@@H](NC([C@@H](NC([C@@H](NC([C@@H](N[H])CCSC)=O)CC(O)=O)=O)CCC/N=C(N[H])/N)=O)CCC(O…	3258.46	Mycobacterium ulcerans Agy99	https://doi.org/10.1074/jbc.M117.795682
Mycofactocin Precursor Peptide MftA (MEPNQHVEAETELVTETLVEEVSIDGMCGVY)	MftA (M. smegmatis / WP_029104568.1)	C146H231N35O55S3	OC(CC[C@H](NC([C@H](CCSC)N[H])=O)C(N1CCC[C@H]1C(N[C@@H](CC(N[H])=O)C(N[C@@H](CCC(N[H])=O)C(N[C@@H](CC2=CN([H])C=N2)C(N[C@@H](C(C)C)C(N[C@@H](CCC(O)=O)C(N[C@H](C(N[C@@H](CCC(O)=O)C(N[C@@]([H])([C@@H](C)O[H])C(N[C@@H](CCC(O)=O)C(N[C@H](C(N[C@@H](C(C)C)C(N[C@@]([H])([C@@H](C)O[H])C(N[C@@H](CCC(O)=O)C(N[C@@]([H])([C@@H](C)O[H])C(N[C@H](C(N[C@@H](C(C)C)C(N[C@@H](CCC(O)=O)C(N[C@@H](CCC(O)=O)C(N[C@@H](C…	OC(CC[C@H](NC([C@H](CCSC)N[H])=O)C(N1CCC[C@H]1C(N[C@@H](CC(N[H])=O)C(N[C@@H](CCC(N[H])=O)C(N[C@@H](CC2=CN([H])C=N2)C(N[C@@H](C(C)C)C(N[C@@H](CCC(O)=O)C(N[C@H](C(N[C@@H](CCC(O)=O)C(N[C@@]([H])([C@@H](C)O[H])C(N[C@@H](CCC(O)=O)C(N[C@H](C(N[C@@H](C(C)C)C(N[C@@]([H])([C@@H](C)O[H])C(N[C@@H](CCC(O)=O)C(N[C@@]([H])([C@@H](C)O[H])C(N[C@H](C(N[C@@H](C(C)C)C(N[C@@H](CCC(O)=O)C(N[C@@H](CCC(O)=O)C(N[C@@H](C…	3450.55	Mycolicibacterium smegmatis mc² 155	https://doi.org/10.1186/1471-2164-12-21 (Haft 2011)?
Mycofactocin Precursor Peptide MftA, modified by MftC	MftA* (M. smegmatis / WP_029104568.1)	C145H229N35O53S3	OC(CC[C@H](NC([C@H](CCSC)N[H])=O)C(N1CCC[C@H]1C(N[C@@H](CC(N[H])=O)C(N[C@@H](CCC(N[H])=O)C(N[C@@H](CC2=CN([H])C=N2)C(N[C@@H](C(C)C)C(N[C@@H](CCC(O)=O)C(N[C@H](C(N[C@@H](CCC(O)=O)C(N[C@@]([H])([C@@H](C)O[H])C(N[C@@H](CCC(O)=O)C(N[C@H](C(N[C@@H](C(C)C)C(N[C@@]([H])([C@@H](C)O[H])C(N[C@@H](CCC(O)=O)C(N[C@@]([H])([C@@H](C)O[H])C(N[C@H](C(N[C@@H](C(C)C)C(N[C@@H](CCC(O)=O)C(N[C@@H](CCC(O)=O)C(N[C@@H](C…	OC(CC[C@H](NC([C@H](CCSC)N[H])=O)C(N1CCC[C@H]1C(N[C@@H](CC(N[H])=O)C(N[C@@H](CCC(N[H])=O)C(N[C@@H](CC2=CN([H])C=N2)C(N[C@@H](C(C)C)C(N[C@@H](CCC(O)=O)C(N[C@H](C(N[C@@H](CCC(O)=O)C(N[C@@]([H])([C@@H](C)O[H])C(N[C@@H](CCC(O)=O)C(N[C@H](C(N[C@@H](C(C)C)C(N[C@@]([H])([C@@H](C)O[H])C(N[C@@H](CCC(O)=O)C(N[C@@]([H])([C@@H](C)O[H])C(N[C@H](C(N[C@@H](C(C)C)C(N[C@@H](CCC(O)=O)C(N[C@@H](CCC(O)=O)C(N[C@@H](C…	3404.55	theoretical	N/A
Glycyl-AHDP (GAHDP), non-glycosylated	GAHDP-0	C15H21N3O3	O=C(CN)NC(C(C)1C)C(NC1CC2=CC=C(O)C=C2)=O	O=C(CN)NC(C(C)1C)C(NC1CC2=CC=C(O)C=C2)=O	291.158	Mycolicibacterium smegmatis mc² 155	https://doi.org/10.1039/D0SC01172J
Glycyl-AHDP (GAHDP), seven-times glycosylated	GAHDP-7	C57H91N3O38	O[C@H]1[C@@H](O)[C@@H](OC2OC(CO)C(OC3O[C@H](CO)[C@H](OC4OC(CO)C(O[C@@H]5O[C@H](CO)[C@H](OC6OC(CO)C(OC7O[C@H](CO)[C@H](O)[C@H](O)[C@@H]7O)[C@H](O)C6O)[C@H](O)[C@@H]5O)[C@H](O)C4O)[C@H](O)[C@@H]3O)[C@H](O)C2O)[C@@H](CO)OC1OC8=CC=C(CC(NC9=O)C(C)(C)C9NC(CN)=O)C=C8	O[C@H]1[C@@H](O)[C@@H](O[C@H]2O[C@@H](CO)[C@H](O[C@H]3O[C@@H](CO)[C@H](O[C@H]4O[C@@H](CO)[C@H](O[C@H]5O[C@@H](CO)[C@H](O[C@H]6O[C@@H](CO)[C@H](O[C@H]7O[C@@H](CO)[C@H](O)[C@H](O)[C@@H]7O)[C@H](O)[C@@H]6O)[C@H](O)[C@@H]5O)[C@H](O)[C@@H]4O)[C@H](O)[C@@H]3O)[C@H](O)[C@@H]2O)[C@H](CO)O[C@@H]1OC8=CC=C(CC(NC9=O)C(C)(C)C9NC(CN)=O)C=C8	1425.53	Mycolicibacterium smegmatis mc² 155	https://doi.org/10.1039/D0SC01172J
3-amino-5-(4-hydroxybenzyl)-4,4-dimethylpyrrolidin-2-one (AHDP), non-glycosylated	AHDP-0	C13H18N2O2	OC1=CC=C(C=C1)CC2NC(C(N)C2(C)C)=O	OC1=CC=C(C=C1)CC2NC(C(N)C2(C)C)=O	234.137	Mycolicibacterium smegmatis mc² 155	https://doi.org/10.1039/D0SC01172J
AHDP, one-time glycosylated	AHDP-1	C19H28N2O7		O=C1C(N)C(C)(C)C(CC2=CC=C(O[C@H]3O[C@@H](CO)[C@H](O)[C@H](O)[C@@H]3O)C=C2)N1	396.19	Mycolicibacterium smegmatis mc² 155 ΔmftD	https://doi.org/10.1039/D0SC01172J
AHDP, two-times glycosylated	AHDP-2	C25H38N2O12		O=C1C(N)C(C)(C)C(CC2=CC=C(O[C@H]3O[C@@H](CO)[C@H](O[C@H]4O[C@@H](CO)[C@H](O)[C@H](O)[C@@H]4O)[C@H](O)[C@@H]3O)C=C2)N1	558.242	Mycolicibacterium smegmatis mc² 155	https://doi.org/10.3389/fbioe.2020.593781
AHDP, three-times glycosylated	AHDP-3	C31H48N2O17		O=C1C(N)C(C)(C)C(CC2=CC=C(O[C@H]3O[C@@H](CO)[C@H](O[C@H]4O[C@@H](CO)[C@H](O[C@H]5O[C@@H](CO)[C@H](O)[C@H](O)[C@@H]5O)[C@H](O)[C@@H]4O)[C@H](O)[C@@H]3O)C=C2)N1	720.295	Mycolicibacterium smegmatis mc² 155 ΔmftD	https://doi.org/10.1039/D0SC01172J
AHDP, four-times glycosylated	AHDP-4	C37H58N2O22		O=C1C(N)C(C)(C)C(CC2=CC=C(O[C@H]3O[C@@H](CO)[C@H](O[C@H]4O[C@@H](CO)[C@H](O[C@H]5O[C@@H](CO)[C@H](O[C@H]6O[C@@H](CO)[C@H](O)[C@H](O)[C@@H]6O)[C@H](O)[C@@H]5O)[C@H](O)[C@@H]4O)[C@H](O)[C@@H]3O)C=C2)N1	882.348	Mycolicibacterium smegmatis mc² 155 ΔmftD	https://doi.org/10.1039/D0SC01172J
AHDP, five-times glycosylated	AHDP-5	C43H68N2O27		O=C1C(N)C(C)(C)C(CC2=CC=C(O[C@H]3O[C@@H](CO)[C@H](O[C@H]4O[C@@H](CO)[C@H](O[C@H]5O[C@@H](CO)[C@H](O[C@H]6O[C@@H](CO)[C@H](O[C@H]7O[C@@H](CO)[C@H](O)[C@H](O)[C@@H]7O)[C@H](O)[C@@H]6O)[C@H](O)[C@@H]5O)[C@H](O)[C@@H]4O)[C@H](O)[C@@H]3O)C=C2)N1	1044.4	Mycolicibacterium smegmatis mc² 155 ΔmftD	https://doi.org/10.1039/D0SC01172J
AHDP, six-times glycosylated	AHDP-6	C49H78N2O32		O=C1C(N)C(C)(C)C(CC2=CC=C(O[C@H]3O[C@@H](CO)[C@H](O[C@H]4O[C@@H](CO)[C@H](O[C@H]5O[C@@H](CO)[C@H](O[C@H]6O[C@@H](CO)[C@H](O[C@H]7O[C@@H](CO)[C@H](O[C@H]8O[C@@H](CO)[C@H](O)[C@H](O)[C@@H]8O)[C@H](O)[C@@H]7O)[C@H](O)[C@@H]6O)[C@H](O)[C@@H]5O)[C@H](O)[C@@H]4O)[C@H](O)[C@@H]3O)C=C2)N1	1206.45	Mycolicibacterium smegmatis mc² 155 ΔmftD	https://doi.org/10.1039/D0SC01172J
AHDP, seven-times glycosylated	AHDP-7	C55H88N2O37		O=C1C(N)C(C)(C)C(CC2=CC=C(O[C@H]3O[C@@H](CO)[C@H](O[C@H]4O[C@@H](CO)[C@H](O[C@H]5O[C@@H](CO)[C@H](O[C@H]6O[C@@H](CO)[C@H](O[C@H]7O[C@@H](CO)[C@H](O[C@H]8O[C@@H](CO)[C@H](O[C@H]9O[C@@H](CO)[C@H](O)[C@H](O)[C@@H]9O)[C@H](O)[C@@H]8O)[C@H](O)[C@@H]7O)[C@H](O)[C@@H]6O)[C@H](O)[C@@H]5O)[C@H](O)[C@@H]4O)[C@H](O)[C@@H]3O)C=C2)N1	1368.51	Mycolicibacterium smegmatis mc² 155	https://doi.org/10.3389/fbioe.2020.593781
AHDP, eight-times glycosylated	AHDP-8	C61H98N2O42		O=C1C(N)C(C)(C)C(CC2=CC=C(O[C@H]3O[C@@H](CO)[C@H](O[C@H]4O[C@@H](CO)[C@H](O[C@H]5O[C@@H](CO)[C@H](O[C@H]6O[C@@H](CO)[C@H](O[C@H]7O[C@@H](CO)[C@H](O[C@H]8O[C@@H](CO)[C@H](O[C@H]9O[C@@H](CO)[C@H](O[C@H]%10O[C@@H](CO)[C@H](O)[C@H](O)[C@@H]%10O)[C@H](O)[C@@H]9O)[C@H](O)[C@@H]8O)[C@H](O)[C@@H]7O)[C@H](O)[C@@H]6O)[C@H](O)[C@@H]5O)[C@H](O)[C@@H]4O)[C@H](O)[C@@H]3O)C=C2)N1	1530.56	Mycolicibacterium smegmatis mc² 155	https://doi.org/10.1039/D0SC01172J
AHDP, nine-times glycosylated	AHDP-9	C67H108N2O47		O=C1C(N)C(C)(C)C(CC2=CC=C(O[C@H]3O[C@@H](CO)[C@H](O[C@H]4O[C@@H](CO)[C@H](O[C@H]5O[C@@H](CO)[C@H](O[C@H]6O[C@@H](CO)[C@H](O[C@H]7O[C@@H](CO)[C@H](O[C@H]8O[C@@H](CO)[C@H](O[C@H]9O[C@@H](CO)[C@H](O[C@H]%10O[C@@H](CO)[C@H](O[C@H]%11O[C@@H](CO)[C@H](O)[C@H](O)[C@@H]%11O)[C@H](O)[C@@H]%10O)[C@H](O)[C@@H]9O)[C@H](O)[C@@H]8O)[C@H](O)[C@@H]7O)[C@H](O)[C@@H]6O)[C@H](O)[C@@H]5O)[C@H](O)[C@@H]4O)[C@H](O)[C@…	1692.61	Mycolicibacterium smegmatis mc² 155 ΔmftD	https://doi.org/10.1039/D0SC01172J
AHDP, ten-times glycosylated	AHDP-10	C73H118N2O52		O=C1C(N)C(C)(C)C(CC2=CC=C(O[C@H]3O[C@@H](CO)[C@H](O[C@H]4O[C@@H](CO)[C@H](O[C@H]5O[C@@H](CO)[C@H](O[C@H]6O[C@@H](CO)[C@H](O[C@H]7O[C@@H](CO)[C@H](O[C@H]8O[C@@H](CO)[C@H](O[C@H]9O[C@@H](CO)[C@H](O[C@H]%10O[C@@H](CO)[C@H](O[C@H]%11O[C@@H](CO)[C@H](O[C@H]%12O[C@@H](CO)[C@H](O)[C@H](O)[C@@H]%12O)[C@H](O)[C@@H]%11O)[C@H](O)[C@@H]%10O)[C@H](O)[C@@H]9O)[C@H](O)[C@@H]8O)[C@H](O)[C@@H]7O)[C@H](O)[C@@H]6O)…	1854.67	Mycolicibacterium smegmatis mc² 155 ΔmftD	https://doi.org/10.1039/D0SC01172J
AHDP, two-times glycosylated, second glucose 2-O-methylated	MAHDP-2	C26H40N2O12		O=C1C(N)C(C)(C)C(CC2=CC=C(O[C@H]3O[C@@H](CO)[C@H](O[C@H]4O[C@@H](CO)[C@H](O)[C@H](O)[C@@H]4OC)[C@H](O)[C@@H]3O)C=C2)N1	572.258	Mycolicibacterium smegmatis mc² 155	https://doi.org/10.3389/fbioe.2020.593781
AHDP, three-times glycosylated, second glucose 2-O-methylated	MAHDP-3	C32H50N2O17		O=C1C(N)C(C)(C)C(CC2=CC=C(O[C@H]3O[C@@H](CO)[C@H](O[C@H]4O[C@@H](CO)[C@H](O[C@H]5O[C@@H](CO)[C@H](O)[C@H](O)[C@@H]5O)[C@H](O)[C@@H]4OC)[C@H](O)[C@@H]3O)C=C2)N1	734.311	Mycolicibacterium smegmatis mc² 155	https://doi.org/10.3389/fbioe.2020.593781
AHDP, four-times glycosylated, second glucose 2-O-methylated	MAHDP-4	C38H60N2O22		O=C1C(N)C(C)(C)C(CC2=CC=C(O[C@H]3O[C@@H](CO)[C@H](O[C@H]4O[C@@H](CO)[C@H](O[C@H]5O[C@@H](CO)[C@H](O[C@H]6O[C@@H](CO)[C@H](O)[C@H](O)[C@@H]6O)[C@H](O)[C@@H]5O)[C@H](O)[C@@H]4OC)[C@H](O)[C@@H]3O)C=C2)N1	896.364	theoretical	N/A
AHDP, five-times glycosylated, second glucose 2-O-methylated	MAHDP-5	C44H70N2O27		O=C1C(N)C(C)(C)C(CC2=CC=C(O[C@H]3O[C@@H](CO)[C@H](O[C@H]4O[C@@H](CO)[C@H](O[C@H]5O[C@@H](CO)[C@H](O[C@H]6O[C@@H](CO)[C@H](O[C@H]7O[C@@H](CO)[C@H](O)[C@H](O)[C@@H]7O)[C@H](O)[C@@H]6O)[C@H](O)[C@@H]5O)[C@H](O)[C@@H]4OC)[C@H](O)[C@@H]3O)C=C2)N1	1058.42	theoretical	N/A
AHDP, six-times glycosylated, second glucose 2-O-methylated	MAHDP-6	C50H80N2O32		O=C1C(N)C(C)(C)C(CC2=CC=C(O[C@H]3O[C@@H](CO)[C@H](O[C@H]4O[C@@H](CO)[C@H](O[C@H]5O[C@@H](CO)[C@H](O[C@H]6O[C@@H](CO)[C@H](O[C@H]7O[C@@H](CO)[C@H](O[C@H]8O[C@@H](CO)[C@H](O)[C@H](O)[C@@H]8O)[C@H](O)[C@@H]7O)[C@H](O)[C@@H]6O)[C@H](O)[C@@H]5O)[C@H](O)[C@@H]4OC)[C@H](O)[C@@H]3O)C=C2)N1	1220.47	theoretical	N/A
AHDP, seven-times glycosylated, second glucose 2-O-methylated	MAHDP-7	C56H90N2O37		O=C1C(N)C(C)(C)C(CC2=CC=C(O[C@H]3O[C@@H](CO)[C@H](O[C@H]4O[C@@H](CO)[C@H](O[C@H]5O[C@@H](CO)[C@H](O[C@H]6O[C@@H](CO)[C@H](O[C@H]7O[C@@H](CO)[C@H](O[C@H]8O[C@@H](CO)[C@H](O[C@H]9O[C@@H](CO)[C@H](O)[C@H](O)[C@@H]9O)[C@H](O)[C@@H]8O)[C@H](O)[C@@H]7O)[C@H](O)[C@@H]6O)[C@H](O)[C@@H]5O)[C@H](O)[C@@H]4OC)[C@H](O)[C@@H]3O)C=C2)N1	1382.52	Mycolicibacterium smegmatis mc² 155	https://doi.org/10.1039/D0SC01172J
AHDP, eight-times glycosylated, second glucose 2-O-methylated	MAHDP-8	C62H100N2O42		O=C1C(N)C(C)(C)C(CC2=CC=C(O[C@H]3O[C@@H](CO)[C@H](O[C@H]4O[C@@H](CO)[C@H](O[C@H]5O[C@@H](CO)[C@H](O[C@H]6O[C@@H](CO)[C@H](O[C@H]7O[C@@H](CO)[C@H](O[C@H]8O[C@@H](CO)[C@H](O[C@H]9O[C@@H](CO)[C@H](O[C@H]%10O[C@@H](CO)[C@H](O)[C@H](O)[C@@H]%10O)[C@H](O)[C@@H]9O)[C@H](O)[C@@H]8O)[C@H](O)[C@@H]7O)[C@H](O)[C@@H]6O)[C@H](O)[C@@H]5O)[C@H](O)[C@@H]4OC)[C@H](O)[C@@H]3O)C=C2)N1	1544.58	Mycolicibacterium smegmatis mc² 155	https://doi.org/10.1039/D0SC01172J
AHDP, nine-times glycosylated, second glucose 2-O-methylated	MAHDP-9	C68H110N2O47		O=C1C(N)C(C)(C)C(CC2=CC=C(O[C@H]3O[C@@H](CO)[C@H](O[C@H]4O[C@@H](CO)[C@H](O[C@H]5O[C@@H](CO)[C@H](O[C@H]6O[C@@H](CO)[C@H](O[C@H]7O[C@@H](CO)[C@H](O[C@H]8O[C@@H](CO)[C@H](O[C@H]9O[C@@H](CO)[C@H](O[C@H]%10O[C@@H](CO)[C@H](O[C@H]%11O[C@@H](CO)[C@H](O)[C@H](O)[C@@H]%11O)[C@H](O)[C@@H]%10O)[C@H](O)[C@@H]9O)[C@H](O)[C@@H]8O)[C@H](O)[C@@H]7O)[C@H](O)[C@@H]6O)[C@H](O)[C@@H]5O)[C@H](O)[C@@H]4OC)[C@H](O)[C…	1706.63	Mycolicibacterium smegmatis mc² 155 ΔmftD	https://doi.org/10.1039/D0SC01172J
AHDP, ten-times glycosylated, second glucose 2-O-methylated	MAHDP-10	C74H120N2O52		O=C1C(N)C(C)(C)C(CC2=CC=C(O[C@H]3O[C@@H](CO)[C@H](O[C@H]4O[C@@H](CO)[C@H](O[C@H]5O[C@@H](CO)[C@H](O[C@H]6O[C@@H](CO)[C@H](O[C@H]7O[C@@H](CO)[C@H](O[C@H]8O[C@@H](CO)[C@H](O[C@H]9O[C@@H](CO)[C@H](O[C@H]%10O[C@@H](CO)[C@H](O[C@H]%11O[C@@H](CO)[C@H](O[C@H]%12O[C@@H](CO)[C@H](O)[C@H](O)[C@@H]%12O)[C@H](O)[C@@H]%11O)[C@H](O)[C@@H]%10O)[C@H](O)[C@@H]9O)[C@H](O)[C@@H]8O)[C@H](O)[C@@H]7O)[C@H](O)[C@@H]6O)…	1868.68	theoretical	N/A
Premycofactocinone	PMFT	C13H15NO3	OC1=CC=C(C=C1)CC(C2(C)C)NC(C2=O)=O	OC1=CC=C(C=C1)CC(C2(C)C)NC(C2=O)=O	233.105	Mycolicibacterium smegmatis mc² 155	https://doi.org/10.1039/D0SC01172J	include or misannotation?
Premycofactocinol	PMFTH2	C13H17NO3	OC1=CC=C(C=C1)CC2NC(C(O)C2(C)C)=O	OC1=CC=C(C=C1)CC2NC(C(O)C2(C)C)=O	235.121	Mycolicibacterium smegmatis mc² 155	https://doi.org/10.1039/D0SC01172J	include or misannotation?
Mycofactocinone-1	MFT-1	C19H25NO8		O=C(NC(CC1=CC=C(O[C@H]2O[C@@H](CO)[C@H](O)[C@H](O)[C@@H]2O)C=C1)C3(C)C)C3=O	395.158	Mycolicibacterium smegmatis mc² 155	https://doi.org/10.1039/D0SC01172J
Mycofactocinol-1	MFT-1H2	C19H27NO8	O=C1C(O)C(C)(C)C(CC2=CC=C(O[C@@H]3O[C@H](CO)[C@H](O)[C@H](O)[C@@H]3O)C=C2)N1	O=C1C(O)C(C)(C)C(CC2=CC=C(O[C@H]3O[C@@H](CO)[C@H](O)[C@H](O)[C@@H]3O)C=C2)N1	397.174	Mycolicibacterium smegmatis mc² 155	https://doi.org/10.1039/D0SC01172J
Mycofactocinone-2	MFT-2	C25H35NO13	O=C(NC(CC1=CC=C(O[C@H]2O[C@@H](CO)[C@H](O[C@H]3O[C@@H](CO)[C@H](O)[C@H](O)[C@@H]3O)[C@H](O)[C@@H]2O)C=C1)C4(C)C)C4=O	O=C(NC(CC1=CC=C(O[C@H]2O[C@@H](CO)[C@H](O[C@H]3O[C@@H](CO)[C@H](O)[C@H](O)[C@@H]3O)[C@H](O)[C@@H]2O)C=C1)C4(C)C)C4=O	557.211	theoretical	N/A
Mycofactocinol-2	MFT-2H2	C25H37NO13	O=C1C(O)C(C)(C)C(CC2=CC=C(O[C@H]3O[C@@H](CO)[C@H](O[C@H]4O[C@@H](CO)[C@H](O)[C@H](O)[C@@H]4O)[C@H](O)[C@@H]3O)C=C2)N1	O=C1C(O)C(C)(C)C(CC2=CC=C(O[C@H]3O[C@@H](CO)[C@H](O[C@H]4O[C@@H](CO)[C@H](O)[C@H](O)[C@@H]4O)[C@H](O)[C@@H]3O)C=C2)N1	559.226	Mycolicibacterium smegmatis mc² 155	https://doi.org/10.1039/D0SC01172J
Methylmycofactocinone-2	MMFT-2	C26H37NO13	O=C(NC(CC1=CC=C(O[C@H]2O[C@@H](CO)[C@H](O[C@H]3O[C@@H](CO)[C@H](O)[C@H](O)[C@@H]3OC)[C@H](O)[C@@H]2O)C=C1)C4(C)C)C4=O	O=C(NC(CC1=CC=C(O[C@H]2O[C@@H](CO)[C@H](O[C@H]3O[C@@H](CO)[C@H](O)[C@H](O)[C@@H]3OC)[C@H](O)[C@@H]2O)C=C1)C4(C)C)C4=O	571.226	Mycolicibacterium smegmatis mc² 155	https://doi.org/10.1039/D0SC01172J
Methylmycofactocinol-2	MMFT-2H2	C26H39NO13	O=C1C(O)C(C)(C)C(CC2=CC=C(O[C@H]3O[C@@H](CO)[C@H](O[C@H]4O[C@@H](CO)[C@H](O)[C@H](O)[C@@H]4OC)[C@H](O)[C@@H]3O)C=C2)N1	O=C1C(O)C(C)(C)C(CC2=CC=C(O[C@H]3O[C@@H](CO)[C@H](O[C@H]4O[C@@H](CO)[C@H](O)[C@H](O)[C@@H]4OC)[C@H](O)[C@@H]3O)C=C2)N1	573.242	Mycolicibacterium smegmatis mc² 155	https://doi.org/10.1039/D0SC01172J
Mycofactocinone-3	MFT-3	C31H45NO18		O=C(NC(CC1=CC=C(O[C@H]2O[C@@H](CO)[C@H](O[C@H]3O[C@@H](CO)[C@H](O[C@H]4O[C@@H](CO)[C@H](O)[C@H](O)[C@@H]4O)[C@H](O)[C@@H]3O)[C@H](O)[C@@H]2O)C=C1)C5(C)C)C5=O	719.264	theoretical	N/A
Mycofactocinol-3	MFT-3H2	C31H47NO18		O=C1C(O)C(C)(C)C(CC2=CC=C(O[C@H]3O[C@@H](CO)[C@H](O[C@H]4O[C@@H](CO)[C@H](O[C@H]5O[C@@H](CO)[C@H](O)[C@H](O)[C@@H]5O)[C@H](O)[C@@H]4O)[C@H](O)[C@@H]3O)C=C2)N1	721.279	Mycolicibacterium smegmatis mc² 155	https://doi.org/10.1039/D0SC01172J
Methylmycofactocinone-3	MMFT-3	C32H47NO18	O=C(NC(CC1=CC=C(O[C@@H]2O[C@H](CO)[C@H](OC3OC(CO)C(OC4O[C@H](CO)[C@H](O)[C@H](O)[C@@H]4O)[C@H](O)C3OC)[C@H](O)[C@@H]2O)C=C1)C5(C)C)C5=O	O=C(NC(CC1=CC=C(O[C@H]2O[C@@H](CO)[C@H](O[C@H]3O[C@@H](CO)[C@H](O[C@H]4O[C@@H](CO)[C@H](O)[C@H](O)[C@@H]4O)[C@H](O)[C@@H]3OC)[C@H](O)[C@@H]2O)C=C1)C5(C)C)C5=O	733.279	Saccharopolyspora erythraea NRRL 2338	https://doi.org/10.1021/acschembio.2c00659
Methylmycofactocinol-3	MMFT-3H2	C32H49NO18		O=C1C(O)C(C)(C)C(CC2=CC=C(O[C@H]3O[C@@H](CO)[C@H](O[C@H]4O[C@@H](CO)[C@H](O[C@H]5O[C@@H](CO)[C@H](O)[C@H](O)[C@@H]5O)[C@H](O)[C@@H]4OC)[C@H](O)[C@@H]3O)C=C2)N1	735.295	Mycolicibacterium smegmatis mc² 155	https://doi.org/10.3389/fbioe.2020.593781
Mycofactocinone-4	MFT-4	C37H55NO23		O=C(NC(CC1=CC=C(O[C@H]2O[C@@H](CO)[C@H](O[C@H]3O[C@@H](CO)[C@H](O[C@H]4O[C@@H](CO)[C@H](O[C@H]5O[C@@H](CO)[C@H](O)[C@H](O)[C@@H]5O)[C@H](O)[C@@H]4O)[C@H](O)[C@@H]3O)[C@H](O)[C@@H]2O)C=C1)C6(C)C)C6=O	881.317	theoretical	N/A
Mycofactocinol-4	MFT-4H2	C37H57NO23		O=C1C(O)C(C)(C)C(CC2=CC=C(O[C@H]3O[C@@H](CO)[C@H](O[C@H]4O[C@@H](CO)[C@H](O[C@H]5O[C@@H](CO)[C@H](O[C@H]6O[C@@H](CO)[C@H](O)[C@H](O)[C@@H]6O)[C@H](O)[C@@H]5O)[C@H](O)[C@@H]4O)[C@H](O)[C@@H]3O)C=C2)N1	883.332	Mycolicibacterium smegmatis mc² 155	https://doi.org/10.1039/D0SC01172J
Methylmycofactocinone-4	MMFT-4	C38H57NO23		O=C(NC(CC1=CC=C(O[C@H]2O[C@@H](CO)[C@H](O[C@H]3O[C@@H](CO)[C@H](O[C@H]4O[C@@H](CO)[C@H](O[C@H]5O[C@@H](CO)[C@H](O)[C@H](O)[C@@H]5O)[C@H](O)[C@@H]4O)[C@H](O)[C@@H]3OC)[C@H](O)[C@@H]2O)C=C1)C6(C)C)C6=O	895.332	Mycolicibacterium smegmatis mc² 155	https://doi.org/10.1039/D0SC01172J
Methylmycofactocinol-4	MMFT-4H2	C38H59NO23		O=C1C(O)C(C)(C)C(CC2=CC=C(O[C@H]3O[C@@H](CO)[C@H](O[C@H]4O[C@@H](CO)[C@H](O[C@H]5O[C@@H](CO)[C@H](O[C@H]6O[C@@H](CO)[C@H](O)[C@H](O)[C@@H]6O)[C@H](O)[C@@H]5O)[C@H](O)[C@@H]4OC)[C@H](O)[C@@H]3O)C=C2)N1	897.348	Mycolicibacterium smegmatis mc² 155	https://doi.org/10.1039/D0SC01172J
Mycofactocinone-5	MFT-5	C43H65NO28		O=C(NC(CC1=CC=C(O[C@H]2O[C@@H](CO)[C@H](O[C@H]3O[C@@H](CO)[C@H](O[C@H]4O[C@@H](CO)[C@H](O[C@H]5O[C@@H](CO)[C@H](O[C@H]6O[C@@H](CO)[C@H](O)[C@H](O)[C@@H]6O)[C@H](O)[C@@H]5O)[C@H](O)[C@@H]4O)[C@H](O)[C@@H]3O)[C@H](O)[C@@H]2O)C=C1)C7(C)C)C7=O	1043.37	theoretical	N/A
Mycofactocinol-5	MFT-5H2	C43H67NO28		O=C1C(O)C(C)(C)C(CC2=CC=C(O[C@H]3O[C@@H](CO)[C@H](O[C@H]4O[C@@H](CO)[C@H](O[C@H]5O[C@@H](CO)[C@H](O[C@H]6O[C@@H](CO)[C@H](O[C@H]7O[C@@H](CO)[C@H](O)[C@H](O)[C@@H]7O)[C@H](O)[C@@H]6O)[C@H](O)[C@@H]5O)[C@H](O)[C@@H]4O)[C@H](O)[C@@H]3O)C=C2)N1	1045.38	Mycolicibacterium smegmatis mc² 155	https://doi.org/10.1039/D0SC01172J
Methylmycofactocinone-5	MMFT-5	C44H67NO28		O=C(NC(CC1=CC=C(O[C@H]2O[C@@H](CO)[C@H](O[C@H]3O[C@@H](CO)[C@H](O[C@H]4O[C@@H](CO)[C@H](O[C@H]5O[C@@H](CO)[C@H](O[C@H]6O[C@@H](CO)[C@H](O)[C@H](O)[C@@H]6O)[C@H](O)[C@@H]5O)[C@H](O)[C@@H]4O)[C@H](O)[C@@H]3OC)[C@H](O)[C@@H]2O)C=C1)C7(C)C)C7=O	1057.38	Mycolicibacterium smegmatis mc² 155	https://doi.org/10.1039/D0SC01172J
Methylmycofactocinol-5	MMFT-5H2	C44H69NO28		O=C1C(O)C(C)(C)C(CC2=CC=C(O[C@H]3O[C@@H](CO)[C@H](O[C@H]4O[C@@H](CO)[C@H](O[C@H]5O[C@@H](CO)[C@H](O[C@H]6O[C@@H](CO)[C@H](O[C@H]7O[C@@H](CO)[C@H](O)[C@H](O)[C@@H]7O)[C@H](O)[C@@H]6O)[C@H](O)[C@@H]5O)[C@H](O)[C@@H]4OC)[C@H](O)[C@@H]3O)C=C2)N1	1059.4	Mycolicibacterium smegmatis mc² 155	https://doi.org/10.1039/D0SC01172J
Mycofactocinone-6	MFT-6	C49H75NO33		O=C(NC(CC1=CC=C(O[C@H]2O[C@@H](CO)[C@H](O[C@H]3O[C@@H](CO)[C@H](O[C@H]4O[C@@H](CO)[C@H](O[C@H]5O[C@@H](CO)[C@H](O[C@H]6O[C@@H](CO)[C@H](O[C@H]7O[C@@H](CO)[C@H](O)[C@H](O)[C@@H]7O)[C@H](O)[C@@H]6O)[C@H](O)[C@@H]5O)[C@H](O)[C@@H]4O)[C@H](O)[C@@H]3O)[C@H](O)[C@@H]2O)C=C1)C8(C)C)C8=O	1205.42	theoretical	N/A
Mycofactocinol-6	MFT-6H2	C49H77NO33		O=C1C(O)C(C)(C)C(CC2=CC=C(O[C@H]3O[C@@H](CO)[C@H](O[C@H]4O[C@@H](CO)[C@H](O[C@H]5O[C@@H](CO)[C@H](O[C@H]6O[C@@H](CO)[C@H](O[C@H]7O[C@@H](CO)[C@H](O[C@H]8O[C@@H](CO)[C@H](O)[C@H](O)[C@@H]8O)[C@H](O)[C@@H]7O)[C@H](O)[C@@H]6O)[C@H](O)[C@@H]5O)[C@H](O)[C@@H]4O)[C@H](O)[C@@H]3O)C=C2)N1	1207.44	Mycolicibacterium smegmatis mc² 155	https://doi.org/10.1039/D0SC01172J
Methylmycofactocinone-6	MMFT-6	C50H77NO33		O=C(NC(CC1=CC=C(O[C@H]2O[C@@H](CO)[C@H](O[C@H]3O[C@@H](CO)[C@H](O[C@H]4O[C@@H](CO)[C@H](O[C@H]5O[C@@H](CO)[C@H](O[C@H]6O[C@@H](CO)[C@H](O[C@H]7O[C@@H](CO)[C@H](O)[C@H](O)[C@@H]7O)[C@H](O)[C@@H]6O)[C@H](O)[C@@H]5O)[C@H](O)[C@@H]4O)[C@H](O)[C@@H]3OC)[C@H](O)[C@@H]2O)C=C1)C8(C)C)C8=O	1219.44	Mycolicibacterium smegmatis mc² 155	https://doi.org/10.1039/D0SC01172J
Methylmycofactocinol-6	MMFT-6H2	C50H79NO33		O=C1C(O)C(C)(C)C(CC2=CC=C(O[C@H]3O[C@@H](CO)[C@H](O[C@H]4O[C@@H](CO)[C@H](O[C@H]5O[C@@H](CO)[C@H](O[C@H]6O[C@@H](CO)[C@H](O[C@H]7O[C@@H](CO)[C@H](O[C@H]8O[C@@H](CO)[C@H](O)[C@H](O)[C@@H]8O)[C@H](O)[C@@H]7O)[C@H](O)[C@@H]6O)[C@H](O)[C@@H]5O)[C@H](O)[C@@H]4OC)[C@H](O)[C@@H]3O)C=C2)N1	1221.45	Mycolicibacterium smegmatis mc² 155	https://doi.org/10.1039/D0SC01172J
Mycofactocinone-7	MFT-7	C55H85NO38	O=C(NC(CC1=CC=C(O[C@H]2O[C@@H](CO)[C@H](O[C@H]3O[C@@H](CO)[C@H](O[C@H]4O[C@@H](CO)[C@H](O[C@H]5O[C@@H](CO)[C@H](O[C@H]6O[C@@H](CO)[C@H](O[C@H]7O[C@@H](CO)[C@H](O[C@H]8O[C@@H](CO)[C@H](O)[C@H](O)[C@@H]8O)[C@H](O)[C@@H]7O)[C@H](O)[C@@H]6O)[C@H](O)[C@@H]5O)[C@H](O)[C@@H]4O)[C@H](O)[C@@H]3O)[C@H](O)[C@@H]2O)C=C1)C9(C)C)C9=O	O=C(NC(CC1=CC=C(O[C@H]2O[C@@H](CO)[C@H](O[C@H]3O[C@@H](CO)[C@H](O[C@H]4O[C@@H](CO)[C@H](O[C@H]5O[C@@H](CO)[C@H](O[C@H]6O[C@@H](CO)[C@H](O[C@H]7O[C@@H](CO)[C@H](O[C@H]8O[C@@H](CO)[C@H](O)[C@H](O)[C@@H]8O)[C@H](O)[C@@H]7O)[C@H](O)[C@@H]6O)[C@H](O)[C@@H]5O)[C@H](O)[C@@H]4O)[C@H](O)[C@@H]3O)[C@H](O)[C@@H]2O)C=C1)C9(C)C)C9=O	1367.47	Mycolicibacterium smegmatis mc² 155	https://doi.org/10.1039/D0SC01172J
Mycofactocinol-7	MFT-7H2	C55H87NO38	O=C1C(O)C(C)(C)C(CC2=CC=C(O[C@H]3O[C@@H](CO)[C@H](O[C@H]4O[C@@H](CO)[C@H](O[C@H]5O[C@@H](CO)[C@H](O[C@H]6O[C@@H](CO)[C@H](O[C@H]7O[C@@H](CO)[C@H](O[C@H]8O[C@@H](CO)[C@H](O[C@H]9O[C@@H](CO)[C@H](O)[C@H](O)[C@@H]9O)[C@H](O)[C@@H]8O)[C@H](O)[C@@H]7O)[C@H](O)[C@@H]6O)[C@H](O)[C@@H]5O)[C@H](O)[C@@H]4O)[C@H](O)[C@@H]3O)C=C2)N1	O=C1C(O)C(C)(C)C(CC2=CC=C(O[C@H]3O[C@@H](CO)[C@H](O[C@H]4O[C@@H](CO)[C@H](O[C@H]5O[C@@H](CO)[C@H](O[C@H]6O[C@@H](CO)[C@H](O[C@H]7O[C@@H](CO)[C@H](O[C@H]8O[C@@H](CO)[C@H](O[C@H]9O[C@@H](CO)[C@H](O)[C@H](O)[C@@H]9O)[C@H](O)[C@@H]8O)[C@H](O)[C@@H]7O)[C@H](O)[C@@H]6O)[C@H](O)[C@@H]5O)[C@H](O)[C@@H]4O)[C@H](O)[C@@H]3O)C=C2)N1	1369.49	Mycolicibacterium smegmatis mc² 155	https://doi.org/10.1039/D0SC01172J
Methylmycofactocinone-7	MMFT-7	C56H87NO38	O=C(NC(CC1=CC=C(O[C@H]2O[C@@H](CO)[C@H](O[C@H]3O[C@@H](CO)[C@H](O[C@H]4O[C@@H](CO)[C@H](O[C@H]5O[C@@H](CO)[C@H](O[C@H]6O[C@@H](CO)[C@H](O[C@H]7O[C@@H](CO)[C@H](O[C@H]8O[C@@H](CO)[C@H](O)[C@H](O)[C@@H]8O)[C@H](O)[C@@H]7O)[C@H](O)[C@@H]6O)[C@H](O)[C@@H]5O)[C@H](O)[C@@H]4O)[C@H](O)[C@@H]3OC)[C@H](O)[C@@H]2O)C=C1)C9(C)C)C9=O	O=C(NC(CC1=CC=C(O[C@H]2O[C@@H](CO)[C@H](O[C@H]3O[C@@H](CO)[C@H](O[C@H]4O[C@@H](CO)[C@H](O[C@H]5O[C@@H](CO)[C@H](O[C@H]6O[C@@H](CO)[C@H](O[C@H]7O[C@@H](CO)[C@H](O[C@H]8O[C@@H](CO)[C@H](O)[C@H](O)[C@@H]8O)[C@H](O)[C@@H]7O)[C@H](O)[C@@H]6O)[C@H](O)[C@@H]5O)[C@H](O)[C@@H]4O)[C@H](O)[C@@H]3OC)[C@H](O)[C@@H]2O)C=C1)C9(C)C)C9=O	1381.49	Mycolicibacterium smegmatis mc² 155	https://doi.org/10.1039/D0SC01172J
Methylmycofactocinol-7	MMFT-7H2	C56H89NO38	O=C1C(O)C(C)(C)C(CC2=CC=C(O[C@H]3O[C@@H](CO)[C@H](O[C@H]4O[C@@H](CO)[C@H](O[C@H]5O[C@@H](CO)[C@H](O[C@H]6O[C@@H](CO)[C@H](O[C@H]7O[C@@H](CO)[C@H](O[C@H]8O[C@@H](CO)[C@H](O[C@H]9O[C@@H](CO)[C@H](O)[C@H](O)[C@@H]9O)[C@H](O)[C@@H]8O)[C@H](O)[C@@H]7O)[C@H](O)[C@@H]6O)[C@H](O)[C@@H]5O)[C@H](O)[C@@H]4OC)[C@H](O)[C@@H]3O)C=C2)N1	O=C1C(O)C(C)(C)C(CC2=CC=C(O[C@H]3O[C@@H](CO)[C@H](O[C@H]4O[C@@H](CO)[C@H](O[C@H]5O[C@@H](CO)[C@H](O[C@H]6O[C@@H](CO)[C@H](O[C@H]7O[C@@H](CO)[C@H](O[C@H]8O[C@@H](CO)[C@H](O[C@H]9O[C@@H](CO)[C@H](O)[C@H](O)[C@@H]9O)[C@H](O)[C@@H]8O)[C@H](O)[C@@H]7O)[C@H](O)[C@@H]6O)[C@H](O)[C@@H]5O)[C@H](O)[C@@H]4OC)[C@H](O)[C@@H]3O)C=C2)N1	1383.51	Mycolicibacterium smegmatis mc² 155	https://doi.org/10.1039/D0SC01172J
Mycofactocinone-8	MFT-8	C61H95NO43	O=C(NC(CC1=CC=C(O[C@H]2O[C@@H](CO)[C@H](O[C@H]3O[C@@H](CO)[C@H](O[C@H]4O[C@@H](CO)[C@H](O[C@H]5O[C@@H](CO)[C@H](O[C@H]6O[C@@H](CO)[C@H](O[C@H]7O[C@@H](CO)[C@H](O[C@H]8O[C@@H](CO)[C@H](O[C@H]9O[C@@H](CO)[C@H](O)[C@H](O)[C@@H]9O)[C@H](O)[C@@H]8O)[C@H](O)[C@@H]7O)[C@H](O)[C@@H]6O)[C@H](O)[C@@H]5O)[C@H](O)[C@@H]4O)[C@H](O)[C@@H]3O)[C@H](O)[C@@H]2O)C=C1)C%10(C)C)C%10=O	O=C(NC(CC1=CC=C(O[C@H]2O[C@@H](CO)[C@H](O[C@H]3O[C@@H](CO)[C@H](O[C@H]4O[C@@H](CO)[C@H](O[C@H]5O[C@@H](CO)[C@H](O[C@H]6O[C@@H](CO)[C@H](O[C@H]7O[C@@H](CO)[C@H](O[C@H]8O[C@@H](CO)[C@H](O[C@H]9O[C@@H](CO)[C@H](O)[C@H](O)[C@@H]9O)[C@H](O)[C@@H]8O)[C@H](O)[C@@H]7O)[C@H](O)[C@@H]6O)[C@H](O)[C@@H]5O)[C@H](O)[C@@H]4O)[C@H](O)[C@@H]3O)[C@H](O)[C@@H]2O)C=C1)C%10(C)C)C%10=O	1529.53	Mycolicibacterium smegmatis mc² 155	https://doi.org/10.1039/D0SC01172J
Mycofactocinol-8	MFT-8H2	C61H97NO43	O=C1C(O)C(C)(C)C(CC2=CC=C(O[C@H]3O[C@@H](CO)[C@H](O[C@H]4O[C@@H](CO)[C@H](O[C@H]5O[C@@H](CO)[C@H](O[C@H]6O[C@@H](CO)[C@H](O[C@H]7O[C@@H](CO)[C@H](O[C@H]8O[C@@H](CO)[C@H](O[C@H]9O[C@@H](CO)[C@H](O[C@H]%10O[C@@H](CO)[C@H](O)[C@H](O)[C@@H]%10O)[C@H](O)[C@@H]9O)[C@H](O)[C@@H]8O)[C@H](O)[C@@H]7O)[C@H](O)[C@@H]6O)[C@H](O)[C@@H]5O)[C@H](O)[C@@H]4O)[C@H](O)[C@@H]3O)C=C2)N1	O=C1C(O)C(C)(C)C(CC2=CC=C(O[C@H]3O[C@@H](CO)[C@H](O[C@H]4O[C@@H](CO)[C@H](O[C@H]5O[C@@H](CO)[C@H](O[C@H]6O[C@@H](CO)[C@H](O[C@H]7O[C@@H](CO)[C@H](O[C@H]8O[C@@H](CO)[C@H](O[C@H]9O[C@@H](CO)[C@H](O[C@H]%10O[C@@H](CO)[C@H](O)[C@H](O)[C@@H]%10O)[C@H](O)[C@@H]9O)[C@H](O)[C@@H]8O)[C@H](O)[C@@H]7O)[C@H](O)[C@@H]6O)[C@H](O)[C@@H]5O)[C@H](O)[C@@H]4O)[C@H](O)[C@@H]3O)C=C2)N1	1531.54	Mycolicibacterium smegmatis mc² 155	https://doi.org/10.1039/D0SC01172J
Methylmycofactocinone-8	MMFT-8	C62H97NO43	O=C(NC(CC1=CC=C(O[C@H]2O[C@@H](CO)[C@H](O[C@H]3O[C@@H](CO)[C@H](O[C@H]4O[C@@H](CO)[C@H](O[C@H]5O[C@@H](CO)[C@H](O[C@H]6O[C@@H](CO)[C@H](O[C@H]7O[C@@H](CO)[C@H](O[C@H]8O[C@@H](CO)[C@H](O[C@H]9O[C@@H](CO)[C@H](O)[C@H](O)[C@@H]9O)[C@H](O)[C@@H]8O)[C@H](O)[C@@H]7O)[C@H](O)[C@@H]6O)[C@H](O)[C@@H]5O)[C@H](O)[C@@H]4O)[C@H](O)[C@@H]3OC)[C@H](O)[C@@H]2O)C=C1)C%10(C)C)C%10=O	O=C(NC(CC1=CC=C(O[C@H]2O[C@@H](CO)[C@H](O[C@H]3O[C@@H](CO)[C@H](O[C@H]4O[C@@H](CO)[C@H](O[C@H]5O[C@@H](CO)[C@H](O[C@H]6O[C@@H](CO)[C@H](O[C@H]7O[C@@H](CO)[C@H](O[C@H]8O[C@@H](CO)[C@H](O[C@H]9O[C@@H](CO)[C@H](O)[C@H](O)[C@@H]9O)[C@H](O)[C@@H]8O)[C@H](O)[C@@H]7O)[C@H](O)[C@@H]6O)[C@H](O)[C@@H]5O)[C@H](O)[C@@H]4O)[C@H](O)[C@@H]3OC)[C@H](O)[C@@H]2O)C=C1)C%10(C)C)C%10=O	1543.54	Mycolicibacterium smegmatis mc² 155	https://doi.org/10.1039/D0SC01172J
Methylmycofactocinol-8	MMFT-8H2	C62H99NO43	O=C1C(O)C(C)(C)C(CC2=CC=C(O[C@H]3O[C@@H](CO)[C@H](O[C@H]4O[C@@H](CO)[C@H](O[C@H]5O[C@@H](CO)[C@H](O[C@H]6O[C@@H](CO)[C@H](O[C@H]7O[C@@H](CO)[C@H](O[C@H]8O[C@@H](CO)[C@H](O[C@H]9O[C@@H](CO)[C@H](O[C@H]%10O[C@@H](CO)[C@H](O)[C@H](O)[C@@H]%10O)[C@H](O)[C@@H]9O)[C@H](O)[C@@H]8O)[C@H](O)[C@@H]7O)[C@H](O)[C@@H]6O)[C@H](O)[C@@H]5O)[C@H](O)[C@@H]4OC)[C@H](O)[C@@H]3O)C=C2)N1	O=C1C(O)C(C)(C)C(CC2=CC=C(O[C@H]3O[C@@H](CO)[C@H](O[C@H]4O[C@@H](CO)[C@H](O[C@H]5O[C@@H](CO)[C@H](O[C@H]6O[C@@H](CO)[C@H](O[C@H]7O[C@@H](CO)[C@H](O[C@H]8O[C@@H](CO)[C@H](O[C@H]9O[C@@H](CO)[C@H](O[C@H]%10O[C@@H](CO)[C@H](O)[C@H](O)[C@@H]%10O)[C@H](O)[C@@H]9O)[C@H](O)[C@@H]8O)[C@H](O)[C@@H]7O)[C@H](O)[C@@H]6O)[C@H](O)[C@@H]5O)[C@H](O)[C@@H]4OC)[C@H](O)[C@@H]3O)C=C2)N1	1545.56	Mycolicibacterium smegmatis mc² 155	https://doi.org/10.1039/D0SC01172J
Mycofactocinone-9	MFT-9	C67H105NO48	O=C(NC(CC1=CC=C(O[C@@H]2O[C@H](CO)[C@H](OC3OC(CO)C(OC4O[C@H](CO)[C@H](OC5OC(CO)C(O[C@@H]6O[C@H](CO)[C@H](OC7OC(CO)C(OC8O[C@H](CO)[C@H](OC9OC(CO)C(O[C@@H]%10O[C@H](CO)[C@H](O)[C@H](O)[C@@H]%10O)[C@@H](O)C9O)[C@H](O)[C@@H]8O)[C@@H](O)C7O)[C@H](O)[C@@H]6O)[C@@H](O)C5O)[C@H](O)[C@@H]4O)[C@@H](O)C3O)[C@H](O)[C@@H]2O)C=C1)C%11(C)C)C%11=O	O=C(NC(CC1=CC=C(O[C@H]2O[C@@H](CO)[C@H](O[C@H]3O[C@@H](CO)[C@H](O[C@H]4O[C@@H](CO)[C@H](O[C@H]5O[C@@H](CO)[C@H](O[C@H]6O[C@@H](CO)[C@H](O[C@H]7O[C@@H](CO)[C@H](O[C@H]8O[C@@H](CO)[C@H](O[C@H]9O[C@@H](CO)[C@H](O[C@H]%10O[C@@H](CO)[C@H](O)[C@H](O)[C@@H]%10O)[C@H](O)[C@@H]9O)[C@H](O)[C@@H]8O)[C@H](O)[C@@H]7O)[C@H](O)[C@@H]6O)[C@H](O)[C@@H]5O)[C@H](O)[C@@H]4O)[C@H](O)[C@@H]3O)[C@H](O)[C@@H]2O)C=C1)C%1…	1691.58	Mycolicibacterium smegmatis mc² 155	https://doi.org/10.1039/D0SC01172J
Mycofactocinol-9	MFT-9H2	C67H107NO48	O=C1C(O)C(C)(C)C(CC2=CC=C(O[C@@H]3O[C@H](CO)[C@H](OC4OC(CO)C(OC5O[C@H](CO)[C@H](OC6OC(CO)C(O[C@@H]7O[C@H](CO)[C@H](OC8OC(CO)C(OC9O[C@H](CO)[C@H](OC%10OC(CO)C(O[C@@H]%11O[C@H](CO)[C@H](O)[C@H](O)[C@@H]%11O)[C@H](O)C%10O)[C@H](O)[C@@H]9O)[C@@H](O)C8O)[C@H](O)[C@@H]7O)[C@@H](O)C6O)[C@H](O)[C@@H]5O)[C@H](O)C4O)[C@H](O)[C@@H]3O)C=C2)N1	O=C1C(O)C(C)(C)C(CC2=CC=C(O[C@H]3O[C@@H](CO)[C@H](O[C@H]4O[C@@H](CO)[C@H](O[C@H]5O[C@@H](CO)[C@H](O[C@H]6O[C@@H](CO)[C@H](O[C@H]7O[C@@H](CO)[C@H](O[C@H]8O[C@@H](CO)[C@H](O[C@H]9O[C@@H](CO)[C@H](O[C@H]%10O[C@@H](CO)[C@H](O[C@H]%11O[C@@H](CO)[C@H](O)[C@H](O)[C@@H]%11O)[C@H](O)[C@@H]%10O)[C@H](O)[C@@H]9O)[C@H](O)[C@@H]8O)[C@H](O)[C@@H]7O)[C@H](O)[C@@H]6O)[C@H](O)[C@@H]5O)[C@H](O)[C@@H]4O)[C@H](O)[C@…	1693.6	Mycolicibacterium smegmatis mc² 155	https://doi.org/10.1039/D0SC01172J
Methylmycofactocinone-9	MMFT-9	C68H107NO48	O=C(NC(CC1=CC=C(O[C@@H]2O[C@H](CO)[C@H](OC3OC(CO)C(OC4O[C@H](CO)[C@H](OC5OC(CO)C(O[C@@H]6O[C@H](CO)[C@H](OC7OC(CO)C(OC8O[C@H](CO)[C@H](OC9OC(CO)C(O[C@@H]%10O[C@H](CO)[C@H](O)[C@H](O)[C@@H]%10O)[C@H](O)C9O)[C@H](O)[C@@H]8O)[C@@H](O)C7O)[C@H](O)[C@@H]6O)[C@@H](O)C5O)[C@H](O)[C@@H]4O)[C@H](O)C3OC)[C@H](O)[C@@H]2O)C=C1)C%11(C)C)C%11=O	O=C(NC(CC1=CC=C(O[C@H]2O[C@@H](CO)[C@H](O[C@H]3O[C@@H](CO)[C@H](O[C@H]4O[C@@H](CO)[C@H](O[C@H]5O[C@@H](CO)[C@H](O[C@H]6O[C@@H](CO)[C@H](O[C@H]7O[C@@H](CO)[C@H](O[C@H]8O[C@@H](CO)[C@H](O[C@H]9O[C@@H](CO)[C@H](O[C@H]%10O[C@@H](CO)[C@H](O)[C@H](O)[C@@H]%10O)[C@H](O)[C@@H]9O)[C@H](O)[C@@H]8O)[C@H](O)[C@@H]7O)[C@H](O)[C@@H]6O)[C@H](O)[C@@H]5O)[C@H](O)[C@@H]4O)[C@H](O)[C@@H]3OC)[C@H](O)[C@@H]2O)C=C1)C%…	1705.6	Mycolicibacterium smegmatis mc² 155	https://doi.org/10.1039/D0SC01172J
Methylmycofactocinol-9	MMFT-9H2	C68H109NO48	O=C1C(O)C(C)(C)C(CC2=CC=C(O[C@@H]3O[C@H](CO)[C@H](OC4OC(CO)C(OC5O[C@H](CO)[C@H](OC6OC(CO)C(O[C@@H]7O[C@H](CO)[C@H](OC8OC(CO)C(OC9O[C@H](CO)[C@H](OC%10OC(CO)C(O[C@@H]%11O[C@H](CO)[C@H](O)[C@H](O)[C@@H]%11O)[C@H](O)C%10O)[C@H](O)[C@@H]9O)[C@@H](O)C8O)[C@H](O)[C@@H]7O)[C@@H](O)C6O)[C@H](O)[C@@H]5O)[C@H](O)C4OC)[C@H](O)[C@@H]3O)C=C2)N1	O=C1C(O)C(C)(C)C(CC2=CC=C(O[C@H]3O[C@@H](CO)[C@H](O[C@H]4O[C@@H](CO)[C@H](O[C@H]5O[C@@H](CO)[C@H](O[C@H]6O[C@@H](CO)[C@H](O[C@H]7O[C@@H](CO)[C@H](O[C@H]8O[C@@H](CO)[C@H](O[C@H]9O[C@@H](CO)[C@H](O[C@H]%10O[C@@H](CO)[C@H](O[C@H]%11O[C@@H](CO)[C@H](O)[C@H](O)[C@@H]%11O)[C@H](O)[C@@H]%10O)[C@H](O)[C@@H]9O)[C@H](O)[C@@H]8O)[C@H](O)[C@@H]7O)[C@H](O)[C@@H]6O)[C@H](O)[C@@H]5O)[C@H](O)[C@@H]4OC)[C@H](O)[C…	1707.61	Mycolicibacterium smegmatis mc² 155	https://doi.org/10.1039/D0SC01172J
Mycofactocinone-10	MFT-10	C73H115NO53		O=C(NC(CC1=CC=C(O[C@H]2O[C@@H](CO)[C@H](O[C@H]3O[C@@H](CO)[C@H](O[C@H]4O[C@@H](CO)[C@H](O[C@H]5O[C@@H](CO)[C@H](O[C@H]6O[C@@H](CO)[C@H](O[C@H]7O[C@@H](CO)[C@H](O[C@H]8O[C@@H](CO)[C@H](O[C@H]9O[C@@H](CO)[C@H](O[C@H]%10O[C@@H](CO)[C@H](O[C@H]%11O[C@@H](CO)[C@H](O)[C@H](O)[C@@H]%11O)[C@H](O)[C@@H]%10O)[C@H](O)[C@@H]9O)[C@H](O)[C@@H]8O)[C@H](O)[C@@H]7O)[C@H](O)[C@@H]6O)[C@H](O)[C@@H]5O)[C@H](O)[C@@H]…	1853.63	theoretical	N/A
Mycofactocinol-10	MFT-10H2	C73H117NO53		O=C1C(O)C(C)(C)C(CC2=CC=C(O[C@H]3O[C@@H](CO)[C@H](O[C@H]4O[C@@H](CO)[C@H](O[C@H]5O[C@@H](CO)[C@H](O[C@H]6O[C@@H](CO)[C@H](O[C@H]7O[C@@H](CO)[C@H](O[C@H]8O[C@@H](CO)[C@H](O[C@H]9O[C@@H](CO)[C@H](O[C@H]%10O[C@@H](CO)[C@H](O[C@H]%11O[C@@H](CO)[C@H](O[C@H]%12O[C@@H](CO)[C@H](O)[C@H](O)[C@@H]%12O)[C@H](O)[C@@H]%11O)[C@H](O)[C@@H]%10O)[C@H](O)[C@@H]9O)[C@H](O)[C@@H]8O)[C@H](O)[C@@H]7O)[C@H](O)[C@@H]6O)…	1855.65	theoretical	N/A
Methylmycofactocinone-10	MMFT-10	C74H117NO53		O=C(NC(CC1=CC=C(O[C@H]2O[C@@H](CO)[C@H](O[C@H]3O[C@@H](CO)[C@H](O[C@H]4O[C@@H](CO)[C@H](O[C@H]5O[C@@H](CO)[C@H](O[C@H]6O[C@@H](CO)[C@H](O[C@H]7O[C@@H](CO)[C@H](O[C@H]8O[C@@H](CO)[C@H](O[C@H]9O[C@@H](CO)[C@H](O[C@H]%10O[C@@H](CO)[C@H](O[C@H]%11O[C@@H](CO)[C@H](O)[C@H](O)[C@@H]%11O)[C@H](O)[C@@H]%10O)[C@H](O)[C@@H]9O)[C@H](O)[C@@H]8O)[C@H](O)[C@@H]7O)[C@H](O)[C@@H]6O)[C@H](O)[C@@H]5O)[C@H](O)[C@@H]…	1867.65	theoretical	N/A
Methylmycofactocinol-10	MMFT-10H2	C74H119NO53		O=C1C(O)C(C)(C)C(CC2=CC=C(O[C@H]3O[C@@H](CO)[C@H](O[C@H]4O[C@@H](CO)[C@H](O[C@H]5O[C@@H](CO)[C@H](O[C@H]6O[C@@H](CO)[C@H](O[C@H]7O[C@@H](CO)[C@H](O[C@H]8O[C@@H](CO)[C@H](O[C@H]9O[C@@H](CO)[C@H](O[C@H]%10O[C@@H](CO)[C@H](O[C@H]%11O[C@@H](CO)[C@H](O[C@H]%12O[C@@H](CO)[C@H](O)[C@H](O)[C@@H]%12O)[C@H](O)[C@@H]%11O)[C@H](O)[C@@H]%10O)[C@H](O)[C@@H]9O)[C@H](O)[C@@H]8O)[C@H](O)[C@@H]7O)[C@H](O)[C@@H]6O)…	1869.66	theoretical	N/A

## Sheet: Sheet1
Name	Abbreviation	Sum Formula	SMILES	Theoretical Monoisotopic Mass	Strain (if found in wild type strain, only WT name is provided), only the first reported identification is referenced	Publication	Publication_DOI
Mycofactocin Precursor Peptide MftA (MDRETEAETAELVTESLVEEVSIDGMCGVY)	MftA (M. ulcerans / WP_071498352.1)	C137H221N33O55S3	OC([C@@H](NC([C@@H](NC(CNC([C@@H](NC([C@@H](NC(CNC([C@@H](NC([C@]([C@@H](C)CC)(NC([C@@H](NC([C@@H](NC([C@@H](NC([C@@H](NC([C@@H](NC([C@H](CC(C)C)NC([C@@H](NC([C@@H](NC([C@]([C@H](O[H])C)(NC([C@@H](NC([C@H](CC(C)C)NC([C@@H](NC([C@H](C)NC([C@]([C@H](O[H])C)(NC([C@@H](NC([C@H](C)NC([C@@H](NC([C@]([C@H](O[H])C)(NC([C@@H](NC([C@@H](NC([C@@H](NC([C@@H](N[H])CCSC)=O)CC(O)=O)=O)CCC/N=C(N[H])/N)=O)CCC(O)=…	3304.47	Mycobacterium ulcerans Agy99	Khaliullin et al. 2017, JBC	https://doi.org/10.1074/jbc.M117.795682
Mycofactocin Precursor Peptide MftA, modified by MftC	MftA* (M. ulcerans / WP_071498352.1)	C136H219N33O53S3	OC(C=C1)=CC=C1CC2NC(C(NC(CNC([C@@H](NC([C@@H](NC(CNC([C@@H](NC([C@]([C@@H](C)CC)(NC([C@@H](NC([C@@H](NC([C@@H](NC([C@@H](NC([C@@H](NC([C@H](CC(C)C)NC([C@@H](NC([C@@H](NC([C@]([C@H](O[H])C)(NC([C@@H](NC([C@H](CC(C)C)NC([C@@H](NC([C@H](C)NC([C@]([C@H](O[H])C)(NC([C@@H](NC([C@H](C)NC([C@@H](NC([C@]([C@H](O[H])C)(NC([C@@H](NC([C@@H](NC([C@@H](NC([C@@H](N[H])CCSC)=O)CC(O)=O)=O)CCC/N=C(N[H])/N)=O)CCC(O…	3258.46	Mycobacterium ulcerans Agy99	Khaliullin et al. 2017, JBC	https://doi.org/10.1074/jbc.M117.795682
Mycofactocin Precursor Peptide MftA (MEPNQHVEAETELVTETLVEEVSIDGMCGVY)	MftA (M. smegmatis / WP_029104568.1)	C146H231N35O55S3	OC(CC[C@H](NC([C@H](CCSC)N[H])=O)C(N1CCC[C@H]1C(N[C@@H](CC(N[H])=O)C(N[C@@H](CCC(N[H])=O)C(N[C@@H](CC2=CN([H])C=N2)C(N[C@@H](C(C)C)C(N[C@@H](CCC(O)=O)C(N[C@H](C(N[C@@H](CCC(O)=O)C(N[C@@]([H])([C@@H](C)O[H])C(N[C@@H](CCC(O)=O)C(N[C@H](C(N[C@@H](C(C)C)C(N[C@@]([H])([C@@H](C)O[H])C(N[C@@H](CCC(O)=O)C(N[C@@]([H])([C@@H](C)O[H])C(N[C@H](C(N[C@@H](C(C)C)C(N[C@@H](CCC(O)=O)C(N[C@@H](CCC(O)=O)C(N[C@@H](C…	3450.55	theoretical	#N/A	##N/A
Mycofactocin Precursor Peptide MftA, modified by MftC	MftA* (M. smegmatis / WP_029104568.1)	C145H229N35O53S3	OC(CC[C@H](NC([C@H](CCSC)N[H])=O)C(N1CCC[C@H]1C(N[C@@H](CC(N[H])=O)C(N[C@@H](CCC(N[H])=O)C(N[C@@H](CC2=CN([H])C=N2)C(N[C@@H](C(C)C)C(N[C@@H](CCC(O)=O)C(N[C@H](C(N[C@@H](CCC(O)=O)C(N[C@@]([H])([C@@H](C)O[H])C(N[C@@H](CCC(O)=O)C(N[C@H](C(N[C@@H](C(C)C)C(N[C@@]([H])([C@@H](C)O[H])C(N[C@@H](CCC(O)=O)C(N[C@@]([H])([C@@H](C)O[H])C(N[C@H](C(N[C@@H](C(C)C)C(N[C@@H](CCC(O)=O)C(N[C@@H](CCC(O)=O)C(N[C@@H](C…	3404.55	theoretical	#N/A	#N/A
Glycyl-AHDP (GAHDP), non-glycosylated	GAHDP-0	C15H21N3O3	OC1=CC=C(CC(N2)C(C)(C)C(NC(CN)=O)C2=O)C=C1	291.158	Mycolicibacterium smegmatis mc² 155	Peña-Ortiz et al. 2020, RCS Chem Sci	https://doi.org/10.1039/D0SC01172J
Glycyl-AHDP (GAHDP), one-time glycosylated	GAHDP-1	C21H31N3O8	O[C@H]1[C@H](O)[C@@H](O)[C@H](OC2=CC=C(CC(N3)C(C)(C)C(NC(CN)=O)C3=O)C=C2)O[C@@H]1CO	453.211	Mycolicibacterium smegmatis mc² 155	Peña-Ortiz et al. 2020, RCS Chem Sci	https://doi.org/10.1039/D0SC01172J
Glycyl-AHDP (GAHDP), two-times glycosylated	GAHDP-2	C27H41N3O13	O[C@H]1[C@H](O)[C@@H](O)[C@H](O[C@H]2[C@H](O)[C@@H](O)[C@H](OC3=CC=C(CC(N4)C(C)(C)C(NC(CN)=O)C4=O)C=C3)O[C@@H]2CO)O[C@@H]1CO	615.264	Mycolicibacterium smegmatis mc² 155	Peña-Ortiz et al. 2020, RCS Chem Sci	https://doi.org/10.1039/D0SC01172J
Glycyl-AHDP (GAHDP), three-times glycosylated	GAHDP-3	C33H51N3O18	O[C@H]1[C@H](O[C@@H]2O[C@H](CO)[C@@H](O)[C@H](O)[C@H]2O)[C@@H](CO)O[C@@H](O[C@H]3[C@H](O)[C@@H](O)[C@H](OC4=CC=C(CC(N5)C(C)(C)C(NC(CN)=O)C5=O)C=C4)O[C@@H]3CO)[C@@H]1O	777.317	Mycolicibacterium smegmatis mc² 155	Peña-Ortiz et al. 2020, RCS Chem Sci	https://doi.org/10.1039/D0SC01172J
Glycyl-AHDP (GAHDP), four-times glycosylated	GAHDP-4	C39H61N3O23	O[C@H]1[C@H](O[C@@H]2O[C@H](CO)[C@@H](O[C@H](O[C@@H]3CO)[C@H](O)[C@@H](O)[C@@H]3O)[C@H](O)[C@H]2O)[C@@H](CO)O[C@@H](O[C@H]4[C@H](O)[C@@H](O)[C@H](OC5=CC=C(CC(N6)C(C)(C)C(NC(CN)=O)C6=O)C=C5)O[C@@H]4CO)[C@@H]1O	939.37	Mycolicibacterium smegmatis mc² 155	Peña-Ortiz et al. 2020, RCS Chem Sci	https://doi.org/10.1039/D0SC01172J
Glycyl-AHDP (GAHDP), five-times glycosylated	GAHDP-5	C45H71N3O28	O[C@H]1[C@H](O[C@@H]2O[C@H](CO)[C@@H](O[C@H](O[C@@H]3CO)[C@H](O)[C@@H](O)[C@@H]3O[C@H]4[C@H](O)[C@@H](O)[C@H](O)[C@@H](CO)O4)[C@H](O)[C@H]2O)[C@@H](CO)O[C@@H](O[C@H]5[C@H](O)[C@@H](O)[C@H](OC6=CC=C(CC(N7)C(C)(C)C(NC(CN)=O)C7=O)C=C6)O[C@@H]5CO)[C@@H]1O	1101.42	Mycolicibacterium smegmatis mc² 155	Peña-Ortiz et al. 2020, RCS Chem Sci	https://doi.org/10.1039/D0SC01172J
Glycyl-AHDP (GAHDP), six-times glycosylated	GAHDP-6	C51H81N3O33	O[C@H]1[C@H](O[C@@H]2O[C@H](CO)[C@@H](O[C@H](O[C@@H]3CO)[C@H](O)[C@@H](O)[C@@H]3O[C@H]4[C@H](O)[C@@H](O)[C@H](O[C@@H]5O[C@H](CO)[C@@H](O)[C@H](O)[C@H]5O)[C@@H](CO)O4)[C@H](O)[C@H]2O)[C@@H](CO)O[C@@H](O[C@H]6[C@H](O)[C@@H](O)[C@H](OC7=CC=C(CC(N8)C(C)(C)C(NC(CN)=O)C8=O)C=C7)O[C@@H]6CO)[C@@H]1O	1263.48	theoretical	Peña-Ortiz et al. 2020, RCS Chem Sci	https://doi.org/10.1039/D0SC01172J
Glycyl-AHDP (GAHDP), seven-times glycosylated	GAHDP-7	C57H91N3O38	O[C@H]1[C@H](O[C@@H]2O[C@H](CO)[C@@H](O[C@H](O[C@@H]3CO)[C@H](O)[C@@H](O)[C@@H]3O[C@H]4[C@H](O)[C@@H](O)[C@H](O[C@@H]5O[C@H](CO)[C@@H](O[C@H]6[C@H](O)[C@@H](O)[C@H](O)[C@@H](CO)O6)[C@H](O)[C@H]5O)[C@@H](CO)O4)[C@H](O)[C@H]2O)[C@@H](CO)O[C@@H](O[C@H]7[C@H](O)[C@@H](O)[C@H](OC8=CC=C(CC(N9)C(C)(C)C(NC(CN)=O)C9=O)C=C8)O[C@@H]7CO)[C@@H]1O	1425.53	Mycolicibacterium smegmatis mc² 155	Peña-Ortiz et al. 2020, RCS Chem Sci	https://doi.org/10.1039/D0SC01172J
Glycyl-AHDP (GAHDP), eight-times glycosylated	GAHDP-8	C63H101N3O43	O[C@H]1[C@H](O[C@@H]2O[C@H](CO)[C@@H](O[C@H](O[C@@H]3CO)[C@H](O)[C@@H](O)[C@@H]3O[C@H]4[C@H](O)[C@@H](O)[C@H](O[C@@H]5O[C@H](CO)[C@@H](O[C@H]6[C@H](O)[C@@H](O)[C@H](O[C@@H]7O[C@H](CO)[C@@H](O)[C@H](O)[C@H]7O)[C@@H](CO)O6)[C@H](O)[C@H]5O)[C@@H](CO)O4)[C@H](O)[C@H]2O)[C@@H](CO)O[C@@H](O[C@H]8[C@H](O)[C@@H](O)[C@H](OC9=CC=C(CC(N%10)C(C)(C)C(NC(CN)=O)C%10=O)C=C9)O[C@@H]8CO)[C@@H]1O	1587.58	Mycolicibacterium smegmatis mc² 155	Peña-Ortiz et al. 2020, RCS Chem Sci	https://doi.org/10.1039/D0SC01172J
Glycyl-AHDP (GAHDP), nine-times glycosylated	GAHDP-9	C69H111N3O48	O[C@H]1[C@H](O[C@@H]2O[C@H](CO)[C@@H](O[C@H](O[C@@H]3CO)[C@H](O)[C@@H](O)[C@@H]3O[C@H]4[C@H](O)[C@@H](O)[C@H](O[C@@H]5O[C@H](CO)[C@@H](O[C@H]6[C@H](O)[C@@H](O)[C@H](O[C@@H]7O[C@H](CO)[C@@H](O[C@@H]8O[C@H](CO)[C@@H](O)[C@H](O)[C@H]8O)[C@H](O)[C@H]7O)[C@@H](CO)O6)[C@H](O)[C@H]5O)[C@@H](CO)O4)[C@H](O)[C@H]2O)[C@@H](CO)O[C@@H](O[C@H]9[C@H](O)[C@@H](O)[C@H](OC%10=CC=C(CC(N%11)C(C)(C)C(NC(CN)=O)C%11=O)…	1749.63	Mycolicibacterium smegmatis mc² 155	Peña-Ortiz et al. 2020, RCS Chem Sci	https://doi.org/10.1039/D0SC01172J
Glycyl-AHDP (GAHDP), ten-times glycosylated	GAHDP-10	C75H121N3O53	O[C@H]1[C@H](O[C@@H]2O[C@H](CO)[C@@H](O[C@H](O[C@@H]3CO)[C@H](O)[C@@H](O)[C@@H]3O[C@H]4[C@H](O)[C@@H](O)[C@H](O[C@@H]5O[C@H](CO)[C@@H](O[C@H]6[C@H](O)[C@@H](O)[C@H](O[C@@H]7O[C@H](CO)[C@@H](O[C@@H]8O[C@H](CO)[C@@H](O[C@@H]9O[C@H](CO)[C@@H](O)[C@H](O)[C@H]9O)[C@H](O)[C@H]8O)[C@H](O)[C@H]7O)[C@@H](CO)O6)[C@H](O)[C@H]5O)[C@@H](CO)O4)[C@H](O)[C@H]2O)[C@@H](CO)O[C@@H](O[C@H]%10[C@H](O)[C@@H](O)[C@H](O…	1911.69	Mycolicibacterium smegmatis mc² 155 ΔmftE	Peña-Ortiz et al. 2020, RCS Chem Sci	https://doi.org/10.1039/D0SC01172J
3-amino-5-(4-hydroxybenzyl)-4,4-dimethylpyrrolidin-2-one (AHDP), non-glycosylated	AHDP-0	C13H18N2O2	OC1=CC=C(CC(N2)C(C)(C)C(N)C2=O)C=C1	234.137	Mycolicibacterium smegmatis mc² 155	Peña-Ortiz et al. 2020, RCS Chem Sci	https://doi.org/10.1039/D0SC01172J
AHDP, one-time glycosylated	AHDP-1	C19H28N2O7	O[C@H]1[C@H](O)[C@@H](O)[C@H](OC2=CC=C(CC(N3)C(C)(C)C(N)C3=O)C=C2)O[C@@H]1CO	396.19	Mycolicibacterium smegmatis mc² 155 ΔmftD	Peña-Ortiz et al. 2020, RCS Chem Sci	https://doi.org/10.1039/D0SC01172J
AHDP, two-times glycosylated	AHDP-2	C25H38N2O12	O[C@H]1[C@H](O)[C@@H](O)[C@H](O[C@H]2[C@H](O)[C@@H](O)[C@H](OC3=CC=C(CC(N4)C(C)(C)C(N)C4=O)C=C3)O[C@@H]2CO)O[C@@H]1CO	558.242	Mycolicibacterium smegmatis mc² 155	Peña-Ortiz et al. 2020, Front Bioeng Biotechnol	https://doi.org/10.3389/fbioe.2020.593781
AHDP, three-times glycosylated	AHDP-3	C31H48N2O17	O[C@H]1[C@H](O[C@@H]2O[C@H](CO)[C@@H](O)[C@H](O)[C@H]2O)[C@@H](CO)O[C@@H](O[C@H]3[C@H](O)[C@@H](O)[C@H](OC4=CC=C(CC(N5)C(C)(C)C(N)C5=O)C=C4)O[C@@H]3CO)[C@@H]1O	720.295	Mycolicibacterium smegmatis mc² 155 ΔmftD	Peña-Ortiz et al. 2020, RCS Chem Sci	https://doi.org/10.1039/D0SC01172J
AHDP, four-times glycosylated	AHDP-4	C37H58N2O22	O[C@H]1[C@H](O[C@@H]2O[C@H](CO)[C@@H](O[C@H](O[C@@H]3CO)[C@H](O)[C@@H](O)[C@@H]3O)[C@H](O)[C@H]2O)[C@@H](CO)O[C@@H](O[C@H]4[C@H](O)[C@@H](O)[C@H](OC5=CC=C(CC(N6)C(C)(C)C(N)C6=O)C=C5)O[C@@H]4CO)[C@@H]1O	882.348	Mycolicibacterium smegmatis mc² 155 ΔmftD	Peña-Ortiz et al. 2020, RCS Chem Sci	https://doi.org/10.1039/D0SC01172J
AHDP, five-times glycosylated	AHDP-5	C43H68N2O27	O[C@H]1[C@H](O[C@@H]2O[C@H](CO)[C@@H](O[C@H](O[C@@H]3CO)[C@H](O)[C@@H](O)[C@@H]3O[C@H]4[C@H](O)[C@@H](O)[C@H](O)[C@@H](CO)O4)[C@H](O)[C@H]2O)[C@@H](CO)O[C@@H](O[C@H]5[C@H](O)[C@@H](O)[C@H](OC6=CC=C(CC(N7)C(C)(C)C(N)C7=O)C=C6)O[C@@H]5CO)[C@@H]1O	1044.4	Mycolicibacterium smegmatis mc² 155 ΔmftD	Peña-Ortiz et al. 2020, RCS Chem Sci	https://doi.org/10.1039/D0SC01172J
AHDP, six-times glycosylated	AHDP-6	C49H78N2O32	O[C@H]1[C@H](O[C@@H]2O[C@H](CO)[C@@H](O[C@H](O[C@@H]3CO)[C@H](O)[C@@H](O)[C@@H]3O[C@H]4[C@H](O)[C@@H](O)[C@H](O[C@@H]5O[C@H](CO)[C@@H](O)[C@H](O)[C@H]5O)[C@@H](CO)O4)[C@H](O)[C@H]2O)[C@@H](CO)O[C@@H](O[C@H]6[C@H](O)[C@@H](O)[C@H](OC7=CC=C(CC(N8)C(C)(C)C(N)C8=O)C=C7)O[C@@H]6CO)[C@@H]1O	1206.45	Mycolicibacterium smegmatis mc² 155 ΔmftD	Peña-Ortiz et al. 2020, RCS Chem Sci	https://doi.org/10.1039/D0SC01172J
AHDP, seven-times glycosylated	AHDP-7	C55H88N2O37	O[C@H]1[C@H](O[C@@H]2O[C@H](CO)[C@@H](O[C@H](O[C@@H]3CO)[C@H](O)[C@@H](O)[C@@H]3O[C@H]4[C@H](O)[C@@H](O)[C@H](O[C@@H]5O[C@H](CO)[C@@H](O[C@H]6[C@H](O)[C@@H](O)[C@H](O)[C@@H](CO)O6)[C@H](O)[C@H]5O)[C@@H](CO)O4)[C@H](O)[C@H]2O)[C@@H](CO)O[C@@H](O[C@H]7[C@H](O)[C@@H](O)[C@H](OC8=CC=C(CC(N9)C(C)(C)C(N)C9=O)C=C8)O[C@@H]7CO)[C@@H]1O	1368.51	Mycolicibacterium smegmatis mc² 155	Peña-Ortiz et al. 2020, Front Bioeng Biotechnol	https://doi.org/10.3389/fbioe.2020.593781
AHDP, eight-times glycosylated	AHDP-8	C61H98N2O42	O[C@H]1[C@H](O[C@@H]2O[C@H](CO)[C@@H](O[C@H](O[C@@H]3CO)[C@H](O)[C@@H](O)[C@@H]3O[C@H]4[C@H](O)[C@@H](O)[C@H](O[C@@H]5O[C@H](CO)[C@@H](O[C@H]6[C@H](O)[C@@H](O)[C@H](O[C@@H]7O[C@H](CO)[C@@H](O)[C@H](O)[C@H]7O)[C@@H](CO)O6)[C@H](O)[C@H]5O)[C@@H](CO)O4)[C@H](O)[C@H]2O)[C@@H](CO)O[C@@H](O[C@H]8[C@H](O)[C@@H](O)[C@H](OC9=CC=C(CC(N%10)C(C)(C)C(N)C%10=O)C=C9)O[C@@H]8CO)[C@@H]1O	1530.56	Mycolicibacterium smegmatis mc² 155	Peña-Ortiz et al. 2020, RCS Chem Sci	https://doi.org/10.1039/D0SC01172J
AHDP, nine-times glycosylated	AHDP-9	C67H108N2O47	O[C@H]1[C@H](O[C@@H]2O[C@H](CO)[C@@H](O[C@H](O[C@@H]3CO)[C@H](O)[C@@H](O)[C@@H]3O[C@H]4[C@H](O)[C@@H](O)[C@H](O[C@@H]5O[C@H](CO)[C@@H](O[C@H]6[C@H](O)[C@@H](O)[C@H](O[C@@H]7O[C@H](CO)[C@@H](O[C@@H]8O[C@H](CO)[C@@H](O)[C@H](O)[C@H]8O)[C@H](O)[C@H]7O)[C@@H](CO)O6)[C@H](O)[C@H]5O)[C@@H](CO)O4)[C@H](O)[C@H]2O)[C@@H](CO)O[C@@H](O[C@H]9[C@H](O)[C@@H](O)[C@H](OC%10=CC=C(CC(N%11)C(C)(C)C(N)C%11=O)C=C%10)…	1692.61	Mycolicibacterium smegmatis mc² 155 ΔmftD	Peña-Ortiz et al. 2020, RCS Chem Sci	https://doi.org/10.1039/D0SC01172J
AHDP, ten-times glycosylated	AHDP-10	C73H118N2O52	O[C@H]1[C@H](O[C@@H]2O[C@H](CO)[C@@H](O[C@H](O[C@@H]3CO)[C@H](O)[C@@H](O)[C@@H]3O[C@H]4[C@H](O)[C@@H](O)[C@H](O[C@@H]5O[C@H](CO)[C@@H](O[C@H]6[C@H](O)[C@@H](O)[C@H](O[C@@H]7O[C@H](CO)[C@@H](O[C@@H]8O[C@H](CO)[C@@H](O[C@@H]9O[C@H](CO)[C@@H](O)[C@H](O)[C@H]9O)[C@H](O)[C@H]8O)[C@H](O)[C@H]7O)[C@@H](CO)O6)[C@H](O)[C@H]5O)[C@@H](CO)O4)[C@H](O)[C@H]2O)[C@@H](CO)O[C@@H](O[C@H]%10[C@H](O)[C@@H](O)[C@H](O…	1854.67	Mycolicibacterium smegmatis mc² 155 ΔmftD	Peña-Ortiz et al. 2020, RCS Chem Sci	https://doi.org/10.1039/D0SC01172J
AHDP, two-times glycosylated, second glucose 2-O-methylated	mAHDP-2	C26H40N2O12	O[C@H]1[C@H](O)[C@@H](OC)[C@H](O[C@H]2[C@H](O)[C@@H](O)[C@H](OC3=CC=C(CC(N4)C(C)(C)C(N)C4=O)C=C3)O[C@@H]2CO)O[C@@H]1CO	572.258	Mycolicibacterium smegmatis mc² 155	Peña-Ortiz et al. 2020, Front Bioeng Biotechnol	https://doi.org/10.3389/fbioe.2020.593781
AHDP, three-times glycosylated, second glucose 2-O-methylated	mAHDP-3	C32H50N2O17	O[C@H]1[C@H](O[C@@H]2O[C@H](CO)[C@@H](O)[C@H](O)[C@H]2O)[C@@H](CO)O[C@@H](O[C@H]3[C@H](O)[C@@H](O)[C@H](OC4=CC=C(CC(N5)C(C)(C)C(N)C5=O)C=C4)O[C@@H]3CO)[C@@H]1OC	734.311	Mycolicibacterium smegmatis mc² 155	Peña-Ortiz et al. 2020, Front Bioeng Biotechnol	https://doi.org/10.3389/fbioe.2020.593781
AHDP, four-times glycosylated, second glucose 2-O-methylated	mAHDP-4	C38H60N2O22	O[C@H]1[C@H](O[C@@H]2O[C@H](CO)[C@@H](O[C@H](O[C@@H]3CO)[C@H](O)[C@@H](O)[C@@H]3O)[C@H](O)[C@H]2O)[C@@H](CO)O[C@@H](O[C@H]4[C@H](O)[C@@H](O)[C@H](OC5=CC=C(CC(N6)C(C)(C)C(N)C6=O)C=C5)O[C@@H]4CO)[C@@H]1OC	896.364	theoretical	#N/A	#N/A
AHDP, five-times glycosylated, second glucose 2-O-methylated	mAHDP-5	C44H70N2O27	O[C@H]1[C@H](O[C@@H]2O[C@H](CO)[C@@H](O[C@H](O[C@@H]3CO)[C@H](O)[C@@H](O)[C@@H]3O[C@H]4[C@H](O)[C@@H](O)[C@H](O)[C@@H](CO)O4)[C@H](O)[C@H]2O)[C@@H](CO)O[C@@H](O[C@H]5[C@H](O)[C@@H](O)[C@H](OC6=CC=C(CC(N7)C(C)(C)C(N)C7=O)C=C6)O[C@@H]5CO)[C@@H]1OC	1058.42	theoretical	#N/A	#N/A
AHDP, six-times glycosylated, second glucose 2-O-methylated	mAHDP-6	C50H80N2O32	O[C@H]1[C@H](O[C@@H]2O[C@H](CO)[C@@H](O[C@H](O[C@@H]3CO)[C@H](O)[C@@H](O)[C@@H]3O[C@H]4[C@H](O)[C@@H](O)[C@H](O[C@@H]5O[C@H](CO)[C@@H](O)[C@H](O)[C@H]5O)[C@@H](CO)O4)[C@H](O)[C@H]2O)[C@@H](CO)O[C@@H](O[C@H]6[C@H](O)[C@@H](O)[C@H](OC7=CC=C(CC(N8)C(C)(C)C(N)C8=O)C=C7)O[C@@H]6CO)[C@@H]1OC	1220.47	theoretical	#N/A	#N/A
AHDP, seven-times glycosylated, second glucose 2-O-methylated	mAHDP-7	C56H90N2O37	O[C@H]1[C@H](O[C@@H]2O[C@H](CO)[C@@H](O[C@H](O[C@@H]3CO)[C@H](O)[C@@H](O)[C@@H]3O[C@H]4[C@H](O)[C@@H](O)[C@H](O[C@@H]5O[C@H](CO)[C@@H](O[C@H]6[C@H](O)[C@@H](O)[C@H](O)[C@@H](CO)O6)[C@H](O)[C@H]5O)[C@@H](CO)O4)[C@H](O)[C@H]2O)[C@@H](CO)O[C@@H](O[C@H]7[C@H](O)[C@@H](O)[C@H](OC8=CC=C(CC(N9)C(C)(C)C(N)C9=O)C=C8)O[C@@H]7CO)[C@@H]1OC	1382.52	Mycolicibacterium smegmatis mc² 155	Peña-Ortiz et al. 2020, RCS Chem Sci	https://doi.org/10.1039/D0SC01172J
AHDP, eight-times glycosylated, second glucose 2-O-methylated	mAHDP-8	C62H100N2O42	O[C@H]1[C@H](O[C@@H]2O[C@H](CO)[C@@H](O[C@H](O[C@@H]3CO)[C@H](O)[C@@H](O)[C@@H]3O[C@H]4[C@H](O)[C@@H](O)[C@H](O[C@@H]5O[C@H](CO)[C@@H](O[C@H]6[C@H](O)[C@@H](O)[C@H](O[C@@H]7O[C@H](CO)[C@@H](O)[C@H](O)[C@H]7O)[C@@H](CO)O6)[C@H](O)[C@H]5O)[C@@H](CO)O4)[C@H](O)[C@H]2O)[C@@H](CO)O[C@@H](O[C@H]8[C@H](O)[C@@H](O)[C@H](OC9=CC=C(CC(N%10)C(C)(C)C(N)C%10=O)C=C9)O[C@@H]8CO)[C@@H]1OC	1544.58	Mycolicibacterium smegmatis mc² 155	Peña-Ortiz et al. 2020, RCS Chem Sci	https://doi.org/10.1039/D0SC01172J
AHDP, nine-times glycosylated, second glucose 2-O-methylated	mAHDP-9	C68H110N2O47	O[C@H]1[C@H](O[C@@H]2O[C@H](CO)[C@@H](O[C@H](O[C@@H]3CO)[C@H](O)[C@@H](O)[C@@H]3O[C@H]4[C@H](O)[C@@H](O)[C@H](O[C@@H]5O[C@H](CO)[C@@H](O[C@H]6[C@H](O)[C@@H](O)[C@H](O[C@@H]7O[C@H](CO)[C@@H](O[C@@H]8O[C@H](CO)[C@@H](O)[C@H](O)[C@H]8O)[C@H](O)[C@H]7O)[C@@H](CO)O6)[C@H](O)[C@H]5O)[C@@H](CO)O4)[C@H](O)[C@H]2O)[C@@H](CO)O[C@@H](O[C@H]9[C@H](O)[C@@H](O)[C@H](OC%10=CC=C(CC(N%11)C(C)(C)C(N)C%11=O)C=C%10)…	1706.63	Mycolicibacterium smegmatis mc² 155 ΔmftD	Peña-Ortiz et al. 2020, RCS Chem Sci	https://doi.org/10.1039/D0SC01172J
AHDP, ten-times glycosylated, second glucose 2-O-methylated	mAHDP-10	C74H120N2O52	O[C@H]1[C@H](O[C@@H]2O[C@H](CO)[C@@H](O[C@H](O[C@@H]3CO)[C@H](O)[C@@H](O)[C@@H]3O[C@H]4[C@H](O)[C@@H](O)[C@H](O[C@@H]5O[C@H](CO)[C@@H](O[C@H]6[C@H](O)[C@@H](O)[C@H](O[C@@H]7O[C@H](CO)[C@@H](O[C@@H]8O[C@H](CO)[C@@H](O[C@@H]9O[C@H](CO)[C@@H](O)[C@H](O)[C@H]9O)[C@H](O)[C@H]8O)[C@H](O)[C@H]7O)[C@@H](CO)O6)[C@H](O)[C@H]5O)[C@@H](CO)O4)[C@H](O)[C@H]2O)[C@@H](CO)O[C@@H](O[C@H]%10[C@H](O)[C@@H](O)[C@H](O…	1868.68	theoretical	#N/A	#N/A
Premycofactocinone (MFT-0), redox-core, non-glycosylated	MFT-0	C13H15NO3	OC1=CC=C(CC(NC2=O)C(C)(C)C2=O)C=C1	233.105	Mycolicibacterium smegmatis mc² 155	Peña-Ortiz et al. 2020, RCS Chem Sci	https://doi.org/10.1039/D0SC01172J
Premycofactocinol (MFT-0H2), redox-core, non-glycosylated	MFT-0H2	C13H17NO3	OC1=CC=C(CC(N2)C(C)(C)C(O)C2=O)C=C1	235.121	Mycolicibacterium smegmatis mc² 155	Peña-Ortiz et al. 2020, RCS Chem Sci	https://doi.org/10.1039/D0SC01172J
Mycofactocinone-1	MFT-1	C19H25NO8	O[C@H]1[C@H](O)[C@@H](O)[C@H](OC2=CC=C(CC(NC3=O)C(C)(C)C3=O)C=C2)O[C@@H]1CO	395.158	Mycolicibacterium smegmatis mc² 155	Peña-Ortiz et al. 2020, RCS Chem Sci	https://doi.org/10.1039/D0SC01172J
Mycofactocinol-1	MFT-1H2	C19H27NO8	O[C@H]1[C@H](O)[C@@H](O)[C@H](OC2=CC=C(CC(N3)C(C)(C)C(O)C3=O)C=C2)O[C@@H]1CO	397.174	Mycolicibacterium smegmatis mc² 155	Peña-Ortiz et al. 2020, RCS Chem Sci	https://doi.org/10.1039/D0SC01172J
Mycofactocinone-2	MFT-2	C25H35NO13	O[C@H]1[C@H](O)[C@@H](O)[C@H](O[C@H]2[C@H](O)[C@@H](O)[C@H](OC3=CC=C(CC(NC4=O)C(C)(C)C4=O)C=C3)O[C@@H]2CO)O[C@@H]1CO	557.211	theoretical	#N/A	#N/A
Mycofactocinol-2	MFT-2H2	C25H37NO13	O[C@H]1[C@H](O)[C@@H](O)[C@H](O[C@H]2[C@H](O)[C@@H](O)[C@H](OC3=CC=C(CC(N4)C(C)(C)C(O)C4=O)C=C3)O[C@@H]2CO)O[C@@H]1CO	559.226	Mycolicibacterium smegmatis mc² 155	Peña-Ortiz et al. 2020, RCS Chem Sci	https://doi.org/10.1039/D0SC01172J
Methylmycofactocinone-2	mMFT-2	C26H37NO13	O[C@H]1[C@H](O)[C@@H](OC)[C@H](O[C@H]2[C@H](O)[C@@H](O)[C@H](OC3=CC=C(CC(NC4=O)C(C)(C)C4=O)C=C3)O[C@@H]2CO)O[C@@H]1CO	571.226	Mycolicibacterium smegmatis mc² 155	Peña-Ortiz et al. 2020, RCS Chem Sci	https://doi.org/10.1039/D0SC01172J
Methylmycofactocinol-2	mMFT-2H2	C26H39NO13	O[C@H]1[C@H](O)[C@@H](OC)[C@H](O[C@H]2[C@H](O)[C@@H](O)[C@H](OC3=CC=C(CC(N4)C(C)(C)C(O)C4=O)C=C3)O[C@@H]2CO)O[C@@H]1CO	573.242	Mycolicibacterium smegmatis mc² 155	Peña-Ortiz et al. 2020, RCS Chem Sci	https://doi.org/10.1039/D0SC01172J
Mycofactocinone-3	MFT-3	C31H45NO18	O[C@H]1[C@H](O[C@@H]2O[C@H](CO)[C@@H](O)[C@H](O)[C@H]2O)[C@@H](CO)O[C@@H](O[C@H]3[C@H](O)[C@@H](O)[C@H](OC4=CC=C(CC(NC5=O)C(C)(C)C5=O)C=C4)O[C@@H]3CO)[C@@H]1O	719.264	theoretical	#N/A	#N/A
Mycofactocinol-3	MFT-3H2	C31H47NO18	O[C@H]1[C@H](O[C@@H]2O[C@H](CO)[C@@H](O)[C@H](O)[C@H]2O)[C@@H](CO)O[C@@H](O[C@H]3[C@H](O)[C@@H](O)[C@H](OC4=CC=C(CC(N5)C(C)(C)C(O)C5=O)C=C4)O[C@@H]3CO)[C@@H]1O	721.279	Mycolicibacterium smegmatis mc² 155	Peña-Ortiz et al. 2020, RCS Chem Sci	https://doi.org/10.1039/D0SC01172J
Methylmycofactocinone-3	mMFT-3	C32H47NO18	O[C@H]1[C@H](O[C@@H]2O[C@H](CO)[C@@H](O)[C@H](O)[C@H]2O)[C@@H](CO)O[C@@H](O[C@H]3[C@H](O)[C@@H](O)[C@H](OC4=CC=C(CC(NC5=O)C(C)(C)C5=O)C=C4)O[C@@H]3CO)[C@@H]1OC	733.279	Saccharopolyspora erythraea NRRL 2338	Ellerhorst et al. 2022, ACS Chem Biol	https://doi.org/10.1021/acschembio.2c00659
Methylmycofactocinol-3	mMFT-3H2	C32H49NO18	O[C@H]1[C@H](O[C@@H]2O[C@H](CO)[C@@H](O)[C@H](O)[C@H]2O)[C@@H](CO)O[C@@H](O[C@H]3[C@H](O)[C@@H](O)[C@H](OC4=CC=C(CC(N5)C(C)(C)C(O)C5=O)C=C4)O[C@@H]3CO)[C@@H]1OC	735.295	Mycolicibacterium smegmatis mc² 155	Peña-Ortiz et al. 2020, Front Bioeng Biotechnol	https://doi.org/10.3389/fbioe.2020.593781
Mycofactocinone-4	MFT-4	C37H55NO23	O[C@H]1[C@H](O[C@@H]2O[C@H](CO)[C@@H](O[C@H](O[C@@H]3CO)[C@H](O)[C@@H](O)[C@@H]3O)[C@H](O)[C@H]2O)[C@@H](CO)O[C@@H](O[C@H]4[C@H](O)[C@@H](O)[C@H](OC5=CC=C(CC(NC6=O)C(C)(C)C6=O)C=C5)O[C@@H]4CO)[C@@H]1O	881.317	theoretical	#N/A	#N/A
Mycofactocinol-4	MFT-4H2	C37H57NO23	O[C@H]1[C@H](O[C@@H]2O[C@H](CO)[C@@H](O[C@H](O[C@@H]3CO)[C@H](O)[C@@H](O)[C@@H]3O)[C@H](O)[C@H]2O)[C@@H](CO)O[C@@H](O[C@H]4[C@H](O)[C@@H](O)[C@H](OC5=CC=C(CC(N6)C(C)(C)C(O)C6=O)C=C5)O[C@@H]4CO)[C@@H]1O	883.332	Mycolicibacterium smegmatis mc² 155	Peña-Ortiz et al. 2020, RCS Chem Sci	https://doi.org/10.1039/D0SC01172J
Methylmycofactocinone-4	mMFT-4	C38H57NO23	O[C@H]1[C@H](O[C@@H]2O[C@H](CO)[C@@H](O[C@H](O[C@@H]3CO)[C@H](O)[C@@H](O)[C@@H]3O)[C@H](O)[C@H]2O)[C@@H](CO)O[C@@H](O[C@H]4[C@H](O)[C@@H](O)[C@H](OC5=CC=C(CC(NC6=O)C(C)(C)C6=O)C=C5)O[C@@H]4CO)[C@@H]1OC	895.332	Mycolicibacterium smegmatis mc² 155	Peña-Ortiz et al. 2020, RCS Chem Sci	https://doi.org/10.1039/D0SC01172J
Methylmycofactocinol-4	mMFT-4H2	C38H59NO23	O[C@H]1[C@H](O[C@@H]2O[C@H](CO)[C@@H](O[C@H](O[C@@H]3CO)[C@H](O)[C@@H](O)[C@@H]3O)[C@H](O)[C@H]2O)[C@@H](CO)O[C@@H](O[C@H]4[C@H](O)[C@@H](O)[C@H](OC5=CC=C(CC(N6)C(C)(C)C(O)C6=O)C=C5)O[C@@H]4CO)[C@@H]1OC	897.348	Mycolicibacterium smegmatis mc² 155	Peña-Ortiz et al. 2020, RCS Chem Sci	https://doi.org/10.1039/D0SC01172J
Mycofactocinone-5	MFT-5	C43H65NO28	O[C@H]1[C@H](O[C@@H]2O[C@H](CO)[C@@H](O[C@H](O[C@@H]3CO)[C@H](O)[C@@H](O)[C@@H]3O[C@H]4[C@H](O)[C@@H](O)[C@H](O)[C@@H](CO)O4)[C@H](O)[C@H]2O)[C@@H](CO)O[C@@H](O[C@H]5[C@H](O)[C@@H](O)[C@H](OC6=CC=C(CC(NC7=O)C(C)(C)C7=O)C=C6)O[C@@H]5CO)[C@@H]1O	1043.37	theoretical	#N/A	#N/A
Mycofactocinol-5	MFT-5H2	C43H67NO28	O[C@H]1[C@H](O[C@@H]2O[C@H](CO)[C@@H](O[C@H](O[C@@H]3CO)[C@H](O)[C@@H](O)[C@@H]3O[C@H]4[C@H](O)[C@@H](O)[C@H](O)[C@@H](CO)O4)[C@H](O)[C@H]2O)[C@@H](CO)O[C@@H](O[C@H]5[C@H](O)[C@@H](O)[C@H](OC6=CC=C(CC(N7)C(C)(C)C(O)C7=O)C=C6)O[C@@H]5CO)[C@@H]1O	1045.38	Mycolicibacterium smegmatis mc² 155	Peña-Ortiz et al. 2020, RCS Chem Sci	https://doi.org/10.1039/D0SC01172J
Methylmycofactocinone-5	mMFT-5	C44H67NO28	O[C@H]1[C@H](O[C@@H]2O[C@H](CO)[C@@H](O[C@H](O[C@@H]3CO)[C@H](O)[C@@H](O)[C@@H]3O[C@H]4[C@H](O)[C@@H](O)[C@H](O)[C@@H](CO)O4)[C@H](O)[C@H]2O)[C@@H](CO)O[C@@H](O[C@H]5[C@H](O)[C@@H](O)[C@H](OC6=CC=C(CC(NC7=O)C(C)(C)C7=O)C=C6)O[C@@H]5CO)[C@@H]1OC	1057.38	Mycolicibacterium smegmatis mc² 155	Peña-Ortiz et al. 2020, RCS Chem Sci	https://doi.org/10.1039/D0SC01172J
Methylmycofactocinol-5	mMFT-5H2	C44H69NO28	O[C@H]1[C@H](O[C@@H]2O[C@H](CO)[C@@H](O[C@H](O[C@@H]3CO)[C@H](O)[C@@H](O)[C@@H]3O[C@H]4[C@H](O)[C@@H](O)[C@H](O)[C@@H](CO)O4)[C@H](O)[C@H]2O)[C@@H](CO)O[C@@H](O[C@H]5[C@H](O)[C@@H](O)[C@H](OC6=CC=C(CC(N7)C(C)(C)C(O)C7=O)C=C6)O[C@@H]5CO)[C@@H]1OC	1059.4	Mycolicibacterium smegmatis mc² 155	Peña-Ortiz et al. 2020, RCS Chem Sci	https://doi.org/10.1039/D0SC01172J
Mycofactocinone-6	MFT-6	C49H75NO33	O[C@H]1[C@H](O[C@@H]2O[C@H](CO)[C@@H](O[C@H](O[C@@H]3CO)[C@H](O)[C@@H](O)[C@@H]3O[C@H]4[C@H](O)[C@@H](O)[C@H](O[C@@H]5O[C@H](CO)[C@@H](O)[C@H](O)[C@H]5O)[C@@H](CO)O4)[C@H](O)[C@H]2O)[C@@H](CO)O[C@@H](O[C@H]6[C@H](O)[C@@H](O)[C@H](OC7=CC=C(CC(NC8=O)C(C)(C)C8=O)C=C7)O[C@@H]6CO)[C@@H]1O	1205.42	theoretical	#N/A	#N/A
Mycofactocinol-6	MFT-6H2	C49H77NO33	O[C@H]1[C@H](O[C@@H]2O[C@H](CO)[C@@H](O[C@H](O[C@@H]3CO)[C@H](O)[C@@H](O)[C@@H]3O[C@H]4[C@H](O)[C@@H](O)[C@H](O[C@@H]5O[C@H](CO)[C@@H](O)[C@H](O)[C@H]5O)[C@@H](CO)O4)[C@H](O)[C@H]2O)[C@@H](CO)O[C@@H](O[C@H]6[C@H](O)[C@@H](O)[C@H](OC7=CC=C(CC(N8)C(C)(C)C(O)C8=O)C=C7)O[C@@H]6CO)[C@@H]1O	1207.44	Mycolicibacterium smegmatis mc² 155	Peña-Ortiz et al. 2020, RCS Chem Sci	https://doi.org/10.1039/D0SC01172J
Methylmycofactocinone-6	mMFT-6	C50H77NO33	O[C@H]1[C@H](O[C@@H]2O[C@H](CO)[C@@H](O[C@H](O[C@@H]3CO)[C@H](O)[C@@H](O)[C@@H]3O[C@H]4[C@H](O)[C@@H](O)[C@H](O[C@@H]5O[C@H](CO)[C@@H](O)[C@H](O)[C@H]5O)[C@@H](CO)O4)[C@H](O)[C@H]2O)[C@@H](CO)O[C@@H](O[C@H]6[C@H](O)[C@@H](O)[C@H](OC7=CC=C(CC(NC8=O)C(C)(C)C8=O)C=C7)O[C@@H]6CO)[C@@H]1OC	1219.44	Mycolicibacterium smegmatis mc² 155	Peña-Ortiz et al. 2020, RCS Chem Sci	https://doi.org/10.1039/D0SC01172J
Methylmycofactocinol-6	mMFT-6H2	C50H79NO33	O[C@H]1[C@H](O[C@@H]2O[C@H](CO)[C@@H](O[C@H](O[C@@H]3CO)[C@H](O)[C@@H](O)[C@@H]3O[C@H]4[C@H](O)[C@@H](O)[C@H](O[C@@H]5O[C@H](CO)[C@@H](O)[C@H](O)[C@H]5O)[C@@H](CO)O4)[C@H](O)[C@H]2O)[C@@H](CO)O[C@@H](O[C@H]6[C@H](O)[C@@H](O)[C@H](OC7=CC=C(CC(N8)C(C)(C)C(O)C8=O)C=C7)O[C@@H]6CO)[C@@H]1OC	1221.45	Mycolicibacterium smegmatis mc² 155	Peña-Ortiz et al. 2020, RCS Chem Sci	https://doi.org/10.1039/D0SC01172J
Mycofactocinone-7	MFT-7	C55H85NO38	O[C@H]1[C@H](O[C@@H]2O[C@H](CO)[C@@H](O[C@H](O[C@@H]3CO)[C@H](O)[C@@H](O)[C@@H]3O[C@H]4[C@H](O)[C@@H](O)[C@H](O[C@@H]5O[C@H](CO)[C@@H](O[C@H]6[C@H](O)[C@@H](O)[C@H](O)[C@@H](CO)O6)[C@H](O)[C@H]5O)[C@@H](CO)O4)[C@H](O)[C@H]2O)[C@@H](CO)O[C@@H](O[C@H]7[C@H](O)[C@@H](O)[C@H](OC8=CC=C(CC(NC9=O)C(C)(C)C9=O)C=C8)O[C@@H]7CO)[C@@H]1O	1367.47	Mycolicibacterium smegmatis mc² 155	Peña-Ortiz et al. 2020, RCS Chem Sci	https://doi.org/10.1039/D0SC01172J
Mycofactocinol-7	MFT-7H2	C55H87NO38	O[C@H]1[C@H](O[C@@H]2O[C@H](CO)[C@@H](O[C@H](O[C@@H]3CO)[C@H](O)[C@@H](O)[C@@H]3O[C@H]4[C@H](O)[C@@H](O)[C@H](O[C@@H]5O[C@H](CO)[C@@H](O[C@H]6[C@H](O)[C@@H](O)[C@H](O)[C@@H](CO)O6)[C@H](O)[C@H]5O)[C@@H](CO)O4)[C@H](O)[C@H]2O)[C@@H](CO)O[C@@H](O[C@H]7[C@H](O)[C@@H](O)[C@H](OC8=CC=C(CC(N9)C(C)(C)C(O)C9=O)C=C8)O[C@@H]7CO)[C@@H]1O	1369.49	Mycolicibacterium smegmatis mc² 155	Peña-Ortiz et al. 2020, RCS Chem Sci	https://doi.org/10.1039/D0SC01172J
Methylmycofactocinone-7	mMFT-7	C56H87NO38	O[C@H]1[C@H](O[C@@H]2O[C@H](CO)[C@@H](O[C@H](O[C@@H]3CO)[C@H](O)[C@@H](O)[C@@H]3O[C@H]4[C@H](O)[C@@H](O)[C@H](O[C@@H]5O[C@H](CO)[C@@H](O[C@H]6[C@H](O)[C@@H](O)[C@H](O)[C@@H](CO)O6)[C@H](O)[C@H]5O)[C@@H](CO)O4)[C@H](O)[C@H]2O)[C@@H](CO)O[C@@H](O[C@H]7[C@H](O)[C@@H](O)[C@H](OC8=CC=C(CC(NC9=O)C(C)(C)C9=O)C=C8)O[C@@H]7CO)[C@@H]1OC	1381.49	Mycolicibacterium smegmatis mc² 155	Peña-Ortiz et al. 2020, RCS Chem Sci	https://doi.org/10.1039/D0SC01172J
Methylmycofactocinol-7	mMFT-7H2	C56H89NO38	O[C@H]1[C@H](O[C@@H]2O[C@H](CO)[C@@H](O[C@H](O[C@@H]3CO)[C@H](O)[C@@H](O)[C@@H]3O[C@H]4[C@H](O)[C@@H](O)[C@H](O[C@@H]5O[C@H](CO)[C@@H](O[C@H]6[C@H](O)[C@@H](O)[C@H](O)[C@@H](CO)O6)[C@H](O)[C@H]5O)[C@@H](CO)O4)[C@H](O)[C@H]2O)[C@@H](CO)O[C@@H](O[C@H]7[C@H](O)[C@@H](O)[C@H](OC8=CC=C(CC(N9)C(C)(C)C(O)C9=O)C=C8)O[C@@H]7CO)[C@@H]1OC	1383.51	Mycolicibacterium smegmatis mc² 155	Peña-Ortiz et al. 2020, RCS Chem Sci	https://doi.org/10.1039/D0SC01172J
Mycofactocinone-8	MFT-8	C61H95NO43	O[C@H]1[C@H](O[C@@H]2O[C@H](CO)[C@@H](O[C@H](O[C@@H]3CO)[C@H](O)[C@@H](O)[C@@H]3O[C@H]4[C@H](O)[C@@H](O)[C@H](O[C@@H]5O[C@H](CO)[C@@H](O[C@H]6[C@H](O)[C@@H](O)[C@H](O[C@@H]7O[C@H](CO)[C@@H](O)[C@H](O)[C@H]7O)[C@@H](CO)O6)[C@H](O)[C@H]5O)[C@@H](CO)O4)[C@H](O)[C@H]2O)[C@@H](CO)O[C@@H](O[C@H]8[C@H](O)[C@@H](O)[C@H](OC9=CC=C(CC(NC%10=O)C(C)(C)C%10=O)C=C9)O[C@@H]8CO)[C@@H]1O	1529.53	Mycolicibacterium smegmatis mc² 155	Peña-Ortiz et al. 2020, RCS Chem Sci	https://doi.org/10.1039/D0SC01172J
Mycofactocinol-8	MFT-8H2	C61H97NO43	O[C@H]1[C@H](O[C@@H]2O[C@H](CO)[C@@H](O[C@H](O[C@@H]3CO)[C@H](O)[C@@H](O)[C@@H]3O[C@H]4[C@H](O)[C@@H](O)[C@H](O[C@@H]5O[C@H](CO)[C@@H](O[C@H]6[C@H](O)[C@@H](O)[C@H](O[C@@H]7O[C@H](CO)[C@@H](O)[C@H](O)[C@H]7O)[C@@H](CO)O6)[C@H](O)[C@H]5O)[C@@H](CO)O4)[C@H](O)[C@H]2O)[C@@H](CO)O[C@@H](O[C@H]8[C@H](O)[C@@H](O)[C@H](OC9=CC=C(CC(N%10)C(C)(C)C(O)C%10=O)C=C9)O[C@@H]8CO)[C@@H]1O	1531.54	Mycolicibacterium smegmatis mc² 155	Peña-Ortiz et al. 2020, RCS Chem Sci	https://doi.org/10.1039/D0SC01172J
Methylmycofactocinone-8	mMFT-8	C62H97NO43	O[C@H]1[C@H](O[C@@H]2O[C@H](CO)[C@@H](O[C@H](O[C@@H]3CO)[C@H](O)[C@@H](O)[C@@H]3O[C@H]4[C@H](O)[C@@H](O)[C@H](O[C@@H]5O[C@H](CO)[C@@H](O[C@H]6[C@H](O)[C@@H](O)[C@H](O[C@@H]7O[C@H](CO)[C@@H](O)[C@H](O)[C@H]7O)[C@@H](CO)O6)[C@H](O)[C@H]5O)[C@@H](CO)O4)[C@H](O)[C@H]2O)[C@@H](CO)O[C@@H](O[C@H]8[C@H](O)[C@@H](O)[C@H](OC9=CC=C(CC(NC%10=O)C(C)(C)C%10=O)C=C9)O[C@@H]8CO)[C@@H]1OC	1543.54	Mycolicibacterium smegmatis mc² 155	Peña-Ortiz et al. 2020, RCS Chem Sci	https://doi.org/10.1039/D0SC01172J
Methylmycofactocinol-8	mMFT-8H2	C62H99NO43	O[C@H]1[C@H](O[C@@H]2O[C@H](CO)[C@@H](O[C@H](O[C@@H]3CO)[C@H](O)[C@@H](O)[C@@H]3O[C@H]4[C@H](O)[C@@H](O)[C@H](O[C@@H]5O[C@H](CO)[C@@H](O[C@H]6[C@H](O)[C@@H](O)[C@H](O[C@@H]7O[C@H](CO)[C@@H](O)[C@H](O)[C@H]7O)[C@@H](CO)O6)[C@H](O)[C@H]5O)[C@@H](CO)O4)[C@H](O)[C@H]2O)[C@@H](CO)O[C@@H](O[C@H]8[C@H](O)[C@@H](O)[C@H](OC9=CC=C(CC(N%10)C(C)(C)C(O)C%10=O)C=C9)O[C@@H]8CO)[C@@H]1OC	1545.56	Mycolicibacterium smegmatis mc² 155	Peña-Ortiz et al. 2020, RCS Chem Sci	https://doi.org/10.1039/D0SC01172J
Mycofactocinone-9	MFT-9	C67H105NO48	O[C@H]1[C@H](O[C@@H]2O[C@H](CO)[C@@H](O[C@H](O[C@@H]3CO)[C@H](O)[C@@H](O)[C@@H]3O[C@H]4[C@H](O)[C@@H](O)[C@H](O[C@@H]5O[C@H](CO)[C@@H](O[C@H]6[C@H](O)[C@@H](O)[C@H](O[C@@H]7O[C@H](CO)[C@@H](O[C@@H]8O[C@H](CO)[C@@H](O)[C@H](O)[C@H]8O)[C@H](O)[C@H]7O)[C@@H](CO)O6)[C@H](O)[C@H]5O)[C@@H](CO)O4)[C@H](O)[C@H]2O)[C@@H](CO)O[C@@H](O[C@H]9[C@H](O)[C@@H](O)[C@H](OC%10=CC=C(CC(NC%11=O)C(C)(C)C%11=O)C=C%10)O…	1691.58	Mycolicibacterium smegmatis mc² 155	Peña-Ortiz et al. 2020, RCS Chem Sci	https://doi.org/10.1039/D0SC01172J
Mycofactocinol-9	MFT-9H2	C67H107NO48	O[C@H]1[C@H](O[C@@H]2O[C@H](CO)[C@@H](O[C@H](O[C@@H]3CO)[C@H](O)[C@@H](O)[C@@H]3O[C@H]4[C@H](O)[C@@H](O)[C@H](O[C@@H]5O[C@H](CO)[C@@H](O[C@H]6[C@H](O)[C@@H](O)[C@H](O[C@@H]7O[C@H](CO)[C@@H](O[C@@H]8O[C@H](CO)[C@@H](O)[C@H](O)[C@H]8O)[C@H](O)[C@H]7O)[C@@H](CO)O6)[C@H](O)[C@H]5O)[C@@H](CO)O4)[C@H](O)[C@H]2O)[C@@H](CO)O[C@@H](O[C@H]9[C@H](O)[C@@H](O)[C@H](OC%10=CC=C(CC(N%11)C(C)(C)C(O)C%11=O)C=C%10)…	1693.6	Mycolicibacterium smegmatis mc² 155	Peña-Ortiz et al. 2020, RCS Chem Sci	https://doi.org/10.1039/D0SC01172J
Methylmycofactocinone-9	mMFT-9	C68H107NO48	O[C@H]1[C@H](O[C@@H]2O[C@H](CO)[C@@H](O[C@H](O[C@@H]3CO)[C@H](O)[C@@H](O)[C@@H]3O[C@H]4[C@H](O)[C@@H](O)[C@H](O[C@@H]5O[C@H](CO)[C@@H](O[C@H]6[C@H](O)[C@@H](O)[C@H](O[C@@H]7O[C@H](CO)[C@@H](O[C@@H]8O[C@H](CO)[C@@H](O)[C@H](O)[C@H]8O)[C@H](O)[C@H]7O)[C@@H](CO)O6)[C@H](O)[C@H]5O)[C@@H](CO)O4)[C@H](O)[C@H]2O)[C@@H](CO)O[C@@H](O[C@H]9[C@H](O)[C@@H](O)[C@H](OC%10=CC=C(CC(NC%11=O)C(C)(C)C%11=O)C=C%10)O…	1705.6	Mycolicibacterium smegmatis mc² 155	Peña-Ortiz et al. 2020, RCS Chem Sci	https://doi.org/10.1039/D0SC01172J
Methylmycofactocinol-9	mMFT-9H2	C68H109NO48	O[C@H]1[C@H](O[C@@H]2O[C@H](CO)[C@@H](O[C@H](O[C@@H]3CO)[C@H](O)[C@@H](O)[C@@H]3O[C@H]4[C@H](O)[C@@H](O)[C@H](O[C@@H]5O[C@H](CO)[C@@H](O[C@H]6[C@H](O)[C@@H](O)[C@H](O[C@@H]7O[C@H](CO)[C@@H](O[C@@H]8O[C@H](CO)[C@@H](O)[C@H](O)[C@H]8O)[C@H](O)[C@H]7O)[C@@H](CO)O6)[C@H](O)[C@H]5O)[C@@H](CO)O4)[C@H](O)[C@H]2O)[C@@H](CO)O[C@@H](O[C@H]9[C@H](O)[C@@H](O)[C@H](OC%10=CC=C(CC(N%11)C(C)(C)C(O)C%11=O)C=C%10)…	1707.61	Mycolicibacterium smegmatis mc² 155	Peña-Ortiz et al. 2020, RCS Chem Sci	https://doi.org/10.1039/D0SC01172J
Mycofactocinone-10	MFT-10	C73H115NO53	O[C@H]1[C@H](O[C@@H]2O[C@H](CO)[C@@H](O[C@H](O[C@@H]3CO)[C@H](O)[C@@H](O)[C@@H]3O[C@H]4[C@H](O)[C@@H](O)[C@H](O[C@@H]5O[C@H](CO)[C@@H](O[C@H]6[C@H](O)[C@@H](O)[C@H](O[C@@H]7O[C@H](CO)[C@@H](O[C@@H]8O[C@H](CO)[C@@H](O[C@@H]9O[C@H](CO)[C@@H](O)[C@H](O)[C@H]9O)[C@H](O)[C@H]8O)[C@H](O)[C@H]7O)[C@@H](CO)O6)[C@H](O)[C@H]5O)[C@@H](CO)O4)[C@H](O)[C@H]2O)[C@@H](CO)O[C@@H](O[C@H]%10[C@H](O)[C@@H](O)[C@H](O…	1853.63	theoretical	#N/A	#N/A
Mycofactocinol-10	MFT-10H2	C73H117NO53	O[C@H]1[C@H](O[C@@H]2O[C@H](CO)[C@@H](O[C@H](O[C@@H]3CO)[C@H](O)[C@@H](O)[C@@H]3O[C@H]4[C@H](O)[C@@H](O)[C@H](O[C@@H]5O[C@H](CO)[C@@H](O[C@H]6[C@H](O)[C@@H](O)[C@H](O[C@@H]7O[C@H](CO)[C@@H](O[C@@H]8O[C@H](CO)[C@@H](O[C@@H]9O[C@H](CO)[C@@H](O)[C@H](O)[C@H]9O)[C@H](O)[C@H]8O)[C@H](O)[C@H]7O)[C@@H](CO)O6)[C@H](O)[C@H]5O)[C@@H](CO)O4)[C@H](O)[C@H]2O)[C@@H](CO)O[C@@H](O[C@H]%10[C@H](O)[C@@H](O)[C@H](O…	1855.65	theoretical	#N/A	#N/A
Methylmycofactocinone-10	mMFT-10	C74H117NO53	O[C@H]1[C@H](O[C@@H]2O[C@H](CO)[C@@H](O[C@H](O[C@@H]3CO)[C@H](O)[C@@H](O)[C@@H]3O[C@H]4[C@H](O)[C@@H](O)[C@H](O[C@@H]5O[C@H](CO)[C@@H](O[C@H]6[C@H](O)[C@@H](O)[C@H](O[C@@H]7O[C@H](CO)[C@@H](O[C@@H]8O[C@H](CO)[C@@H](O[C@@H]9O[C@H](CO)[C@@H](O)[C@H](O)[C@H]9O)[C@H](O)[C@H]8O)[C@H](O)[C@H]7O)[C@@H](CO)O6)[C@H](O)[C@H]5O)[C@@H](CO)O4)[C@H](O)[C@H]2O)[C@@H](CO)O[C@@H](O[C@H]%10[C@H](O)[C@@H](O)[C@H](O…	1867.65	theoretical	#N/A	#N/A
Methylmycofactocinol-10	mMFT-10H2	C74H119NO53	O[C@H]1[C@H](O[C@@H]2O[C@H](CO)[C@@H](O[C@H](O[C@@H]3CO)[C@H](O)[C@@H](O)[C@@H]3O[C@H]4[C@H](O)[C@@H](O)[C@H](O[C@@H]5O[C@H](CO)[C@@H](O[C@H]6[C@H](O)[C@@H](O)[C@H](O[C@@H]7O[C@H](CO)[C@@H](O[C@@H]8O[C@H](CO)[C@@H](O[C@@H]9O[C@H](CO)[C@@H](O)[C@H](O)[C@H]9O)[C@H](O)[C@H]8O)[C@H](O)[C@H]7O)[C@@H](CO)O6)[C@H](O)[C@H]5O)[C@@H](CO)O4)[C@H](O)[C@H]2O)[C@@H](CO)O[C@@H](O[C@H]%10[C@H](O)[C@@H](O)[C@H](O…	1869.66	theoretical	#N/A	#N/A
